# Supplementary material for: Easier said than done: a qualitative study conducted in the USA exploring Latino family child care home providers as role models for healthy eating and physical activity behaviours
Source: PubMed Central journal article supplement — BMJ Open. 2017 Nov 12;7(11):e018219. doi: 10.1136/bmjopen-2017-018219 (PMC5695384; doi:10.1136/bmjopen-2017-018219), 2017-11-12
Supplement: bmjopen-2017-018219.draft_revisions.pdf [file bmjopen-2017-018219.draft_revisions.pdf]

# BMJ Open

BMJ Open is committed to open peer review. As part of this commitment we make the peer review history of every article we publish publicly available.

When an article is published we post the peer reviewers' comments and the authors' responses online. We also post the versions of the paper that were used during peer review. These are the versions that the peer review comments apply to.

The versions of the paper that follow are the versions that were submitted during the peer review process. They are not the versions of record or the final published versions. They should not be cited or distributed as the published version of this manuscript.

BMJ Open is an open access journal and the full, final, typeset and author-corrected version of record of the manuscript is available on our site with no access controls, subscription charges or pay-per-view fees (<http://bmjopen.bmj.com>).

If you have any questions on BMJ Open's open peer review process please email [editorial.bmjopen@bmj.com](mailto:editorial.bmjopen@bmj.com)

# BMJ Open

## Easier Said Than Done: Exploring Latino Family Child Care Home Providers as Role Models for Healthful Eating and Physical Activity Behaviors

|                                 |                                                                                                                                                                                                                                                                                                                      |
|---------------------------------|----------------------------------------------------------------------------------------------------------------------------------------------------------------------------------------------------------------------------------------------------------------------------------------------------------------------|
| Journal:                        | <i>BMJ Open</i>                                                                                                                                                                                                                                                                                                      |
| Manuscript ID                   | bmjopen-2017-018219                                                                                                                                                                                                                                                                                                  |
| Article Type:                   | Research                                                                                                                                                                                                                                                                                                             |
| Date Submitted by the Author:   | 14-Jun-2017                                                                                                                                                                                                                                                                                                          |
| Complete List of Authors:       | Lindsay, AC; University of Massachusetts Boston, Department of Exercise and Health Sciences; Department of Nutrition<br>Greaney, Mary ; University of Rhode Island,<br>Wallington, Sherrie; Georgetown University, Oncology; Georgetown University, Oncology<br>Wrihgt, Julie A.; University of Massachusetts Boston |
| <b>Primary Subject Heading</b>: | Qualitative research                                                                                                                                                                                                                                                                                                 |
| Secondary Subject Heading:      | Qualitative research, Public health                                                                                                                                                                                                                                                                                  |
| Keywords:                       | PREVENTIVE MEDICINE, QUALITATIVE RESEARCH, PUBLIC HEALTH                                                                                                                                                                                                                                                             |
|                                 |                                                                                                                                                                                                                                                                                                                      |

SCHOLARONE™  
Manuscripts

## Latino Family Child Care Providers Role Modeling

**Running head:** Latino Family Child Care Providers Modeling

**Easier Said Than Done: Exploring Latino Family Child Care Home Providers as Role Models for Healthful Eating and Physical Activity Behaviors**

Ana Cristina Lindsay<sup>1,2</sup>, Mary L. Greaney<sup>3</sup>, Sherrie F. Wallington<sup>4</sup>, Julie A. Wrihgt<sup>1</sup>

<sup>1</sup> University of Massachusetts Boston, Exercise and Health Sciences Department, College of Nursing and Health Sciences, Boston, MA, USA.

<sup>2</sup> Harvard T.H. Chan School of Public Health, Department of Nutrition, Boston, MA, USA.

<sup>3</sup> University of Rhode Island, Health Studies & Department of Kinesiology, Kingston, RI, USA

<sup>4</sup> Lombardi Comprehensive Cancer Center, Georgetown University Medical Center, Washington, DC, USA

**Authors' Email Address:**

Ana Cristina Lindsay: Ana.Lindsay@umb.edu

Mary L. Greaney: mgreaney@uri.edu

Sherrie F. Wallington: slw49@georgetown.edu

Julie A. Wrihgt: Julie.Wrihgt@umb.edu

**Address for Correspondence (Permanent address):**

Ana Cristina Lindsay, DDS, MPH, DPH

Associate Professor, Exercise and Health Sciences Department

University of Massachusetts Boston

100 Morrissey Boulevard, Boston, MA 02125

Phone: 617-287-7579

Email: Ana.Lindsay@umb.edu

**Abstract word count:** 247 words

**Main text word count:** 3,059 words

**Tables and figures:** 0

**Number of references:** 31

## Latino Family Child Care Providers Role Modeling

38 **Disclosure Statements**

39  
40 **Acknowledgments:** The authors are grateful for the assistance of personnel at Massachusetts  
41 Department of Early Education and Care, Child Care Circuit, Family Care Systems, and CACFP,  
42 especially “Yours for Children, Inc.” The authors are thankful to the FCCH providers and  
43 parents who participated in this study. This study was supported by a grant from Aetna  
44 Foundation Inc. (Grant no. 11-02395), for which Ana Lindsay, DDS, MPH, DPH, is Principal  
45 Investigator.

46  
47 **Financial Support:** Aetna Foundation Inc. (Grant no. 11-02395)

48  
49 **Conflict of Interest:** The authors declare that there is no conflict of interests regarding the  
50 publication of this paper.

51  
52 **Authorship:** The following co-authors contributed to the work: ACL in study design, data  
53 collection, data analysis, and manuscript preparation and review. MLG in study design,  
54 manuscript preparation, and manuscript review. SFW in development of theoretical framework  
55 for the study, manuscript preparation, and manuscript review. JAW in manuscript preparation  
56 and manuscript review, and MAM in manuscript preparation and manuscript review.

57  
58 **Ethical Standards Disclosure:** This study was approved by the Institutional Review Board for  
59 the Protection of Human Subjects at the Harvard T. H. Chan School of Public Health. Written  
60 and oral informed consent was obtained from all participants.

61  
62  
63 **Data Sharing:** Data and all other materials for this study are kept at the Department of Exercise  
64 and Health Sciences, University of Massachusetts Boston. The datasets generated during and/or  
65 analyzed during the current study are not publicly available due the terms of consent to which  
66 participants agreed to, but are available from the corresponding author on reasonable request.

## Latino Family Child Care Providers Role Modeling

67 **ABSTRACT**

68 **Objective:** Child care providers influence the eating and physical activity behaviors of children  
69 in their care on a daily basis and therefore are important targets for interventions aimed at  
70 prevention of childhood obesity in this setting. There is a paucity of research examining how  
71 child care providers model healthful eating and physical activity behaviors. This study explored  
72 Latino family child care home providers' beliefs and practices related to healthful eating and  
73 physical activity, and providers' views of their ability to serve as role models for these behaviors  
74 for children in their care.

75 **Methods:** Qualitative study. Six focus groups conducted in Spanish with a sample of 44 state-  
76 licensed Latino family child care home providers. Transcripts were analyzed using thematic  
77 analyses to code data in phases to identify meaningful patterns.

78 **Results:** Analyses revealed Latino family child care home providers have positive beliefs and  
79 attitudes about the importance of healthful eating and physical activity for children in their care,  
80 but struggle themselves with eating healthfully, being physically active, and maintaining a  
81 healthy weight status. The ability of Latino family child care home providers to model these  
82 behaviors may be limited.

83 **Conclusions:** Health promotion interventions to improve healthful eating and physical activity  
84 behaviors of children in family child care homes should include components that address  
85 providers modeling of these health behaviors. Quantitative studies should examine the  
86 association between Latino family child care home providers' role modeling of healthful eating  
87 and physical activity behaviors and these behaviors of children in their care.

88 **Keywords:** Latino; role modeling; eating and physical activity; family child care homes;  
89 preschool.

## Latino Family Child Care Providers Role Modeling

**90 Strengths and limitations of this study:**

- 91 • Prior research documents that child care providers influence the eating and physical  
92 activity behaviors of children in their care on a daily basis and therefore are important  
93 targets for interventions aimed at prevention of childhood obesity in child care settings.
- 94 • To our knowledge, this is the first study to examine Latino family child care home  
95 providers' view of their ability to serve as role models for healthful eating and physical  
96 activity behaviors of children in these settings.
- 97 • The study is based on a nonrandom, purposive, and relatively small sample of low-  
98 income, Latino FCCH providers in four selected communities in the state of  
99 Massachusetts, United States.
- 100 • Findings revealed Latino family child care home providers struggle with eating  
101 healthfully, being physically active, and maintaining a healthy weight status.  
102 Providers reported lack of time and daily life demands, including work, as main barriers  
103 to focusing on their own health behaviors and weight status. Several providers expressed  
104 the desire to change their eating and physical activity habits and to improve their personal  
105 health.
- 106 • Interventions and policies aimed at improving the eating and physical activity  
107 environments of FCCHs should target providers' personal behaviors and incorporate  
108 training resources and support that promote behavioral change of providers' own eating  
109 and physical activity and improve their weight status.
- 110 • Findings from the present study add to the scant literature examining FCCH providers'  
111 personal health behaviors and highlight the need for increased attention to FCCH  
112 providers' own health behaviors as a means of promoting providers' own health as well  
113 as healthful eating and physical activity among young children in these settings.

## Latino Family Child Care Providers Role Modeling

114 **INTRODUCTION**

115 Although recent data indicate a decrease in rates of child obesity in the United States, it  
116 remains a significant public health problem.<sup>1</sup> Children in low-income Latino families are at  
117 elevated risk of becoming overweight and obese, making childhood obesity among Latinos a  
118 pressing public health concern as childhood weight status tracks into adulthood.<sup>1</sup> Substantive  
119 efforts are needed to prevent and control obesity among Latino children if future trends in  
120 chronic diseases are to be altered in this population.

121 Early care and education (ECE) settings are important social environments that influence  
122 the eating and physical activity habits of children attending these institutions.<sup>2,3</sup> Rising ECE  
123 attendance rates and increasing time spent in these settings make ECE settings important venues  
124 for health promotion and obesity prevention interventions targeting young children.<sup>4</sup> Family  
125 child care homes (FCCHs) are a type of ECE setting where providers care for children other than  
126 their own in the providers' own home.<sup>4,5</sup> More than 1.9 million pre-school children attend  
127 FCCHs, and this ECE setting is the second largest provider of non-relative care for children up to  
128 5 years old in the United States.<sup>6</sup>

129 Latino families may prefer FCCHs to other ECE settings due to cultural preferences for  
130 family-like care, flexible hours, and lower costs, thus making FCCHs an ideal setting for obesity  
131 prevention efforts designed for Latino families and children.<sup>7</sup> Latino parents who enroll their  
132 children in an FCCH believe that these settings are instrumental in shaping and reinforcing their  
133 children's healthful eating and physical activity habits.<sup>8,9</sup> In fact, recent research suggests that  
134 FCCH providers may be more influential than, or equally as important as, parents in shaping  
135 food preferences of young children.<sup>3,10</sup> FCCH providers, like parents, help establish and  
136 reinforce early healthful eating and physical activity habits among young children on a daily

## Latino Family Child Care Providers Role Modeling

1  
2  
3 137 basis and therefore are key players in preventing childhood obesity by developing an FCCH  
4  
5 138 environment that fosters healthful eating behaviors among children.<sup>10,11</sup> FCCH providers  
6  
7  
8 139 influence behavior in many ways (e.g., knowledge of nutrition, food selection, meal structure,  
9  
10 140 etc.), but recent research suggests that role modeling may be particularly influential in young  
11  
12 141 children developing lifelong habits that contribute to normal weight or to overweight and  
13  
14 142 obesity.<sup>12</sup> *Social cognitive theory* (SCT) posits that behavior acquisition is directly related to  
15  
16 143 observing others within the context of social interactions and experiences.<sup>13,14,15</sup> Bandura<sup>16</sup> has  
17  
18 144 shown that children learn through observing the behaviors of others and the reinforcements they  
19  
20 145 receive. Many types of behaviors, including eating and physical activity behaviors, can be  
21  
22 146 learned through observing influential others such as caregivers and peers. In the context of  
23  
24 147 FCCH, the caregiver may be particularly influential serving as a role model of healthful  
25  
26 148 behaviors.<sup>17</sup>

27  
28  
29 149 Much of the research examining intervention targets for obesity prevention in FCCH  
30  
31 150 settings has focused on improving the eating and physical activity environment and providers'  
32  
33 151 feeding and physical activity practices.<sup>9,18-22</sup> Providers' beliefs, attitudes, and practices related to  
34  
35 152 these health behaviors have been examined to identify potential targets for intervention.<sup>18,20-24</sup>  
36  
37 153 However, there is a paucity of research examining FCCH providers' personal eating and physical  
38  
39 154 activity behaviors and examining how these behaviors may influence the behaviors of children in  
40  
41 155 their care. Therefore, this qualitative study explored how Latino FCCH providers view their  
42  
43 156 ability to serve as role models of healthful eating and physical activity behaviors for young  
44  
45 157 children in these settings.

**METHODS*****Study Design, Setting, and Sample***



## Latino Family Child Care Providers Role Modeling

1  
2  
3 160 This study was part of a multi-component qualitative research project exploring factors  
4  
5  
6 161 influencing eating, physical activity, and sedentary behaviors among Latino preschool-age  
7  
8 162 children attending FCCHs in Massachusetts (MA). As noted in previous studies,<sup>9,19</sup> we worked  
9  
10 163 with FCCH regulators to enroll a random sample of providers from each area of the state (North  
11  
12 164 Shore, Greater Boston, Central MA, and Western MA). We mailed each selected provider a flyer  
13  
14 165 in Spanish outlining the study that included a phone number to call for additional information.  
15  
16 166 Interested providers were screened for eligibility (e.g., being Latino, having at least three  
17  
18 167 children aged 2–5 in the FCCH). A confirmatory/reminder phone call was made one to two days  
19  
20 168 before the scheduled focus group session.  
21  
22  
23

169 ***Data Collection***

24  
25  
26 170 A native Spanish speaker trained in qualitative research methods moderated all focus  
27  
28 171 groups in Spanish using a piloted discussion guide with open-ended questions and probes. The  
29  
30 172 guide explored FCCH providers: (1) beliefs and attitudes related to eating and physical activity,  
31  
32 173 (2) barriers to having and/or maintaining healthful eating and physical activity habits, (3)  
33  
34 174 perceptions of their influence on the eating and physical activity behaviors of children in their  
35  
36 175 care, and (4) perception of their ability to serve as role models of healthful eating and physical  
37  
38 176 activity behaviors for young children in their care. Focus groups, held in meeting rooms of  
39  
40 177 public libraries between April and September 2015, lasted approximately 90 minutes and were  
41  
42 178 audiotaped after participants provided signed informed consent. Before each group, participants  
43  
44 179 completed a brief, self-administered questionnaire assessing education, marital status, country of  
45  
46 180 origin, and length of time living in the United States. Participants received a \$25 gift card for  
47  
48 181 their participation. This study was approved by the Institutional Review Board for the Protection  
49  
50  
51 182 of Human Subjects of the Harvard T.H. Chan School of Public Health.  
52  
53  
54  
55  
56  
57  
58  
59  
60

## Latino Family Child Care Providers Role Modeling

183 ***Data Analysis***

184           Audiotapes were transcribed verbatim in Spanish and translated into English without  
185 identifiers by a bilingual and native Spanish speaker using forward-backward techniques to  
186 establish semantic equivalence in translation. This process ensured that the integrity and  
187 equivalence of the data were not lost in the process of translation.

188           Transcripts were analyzed using thematic analyses, an iterative process of coding data in  
189 phases to identify meaningful patterns.<sup>25</sup> Analytic phases included data familiarization,  
190 generation of initial codes, identifying patterns and themes, and defining and naming themes.<sup>26,27</sup>

191 Two authors, experienced qualitative researchers, independently coded all transcripts and  
192 identified emergent themes. These two authors then checked for consistency between their  
193 analyses and discussed any differences until consensus was reached. An inductive approach was  
194 used, where emerging data was used to develop, refine and verify themes and findings.

195 Descriptive statistics were calculated for the socio-demographic data using Microsoft Excel  
196 2008<sup>®</sup>.

197 **RESULTS**

198           In total, 44 providers (41 female, 3 male), all of whom identified as Hispanic/Latino,  
199 participated in six focus groups. About one third of participants (n = 14; 31.8%) had graduated  
200 from high school or earned their general education diploma (GED), and close to forty percent (n  
201 = 17, 38.6%) had attended some college. Themes that emerged during the qualitative analyses  
202 are discussed below, with quotes used to illustrate the themes.

## Latino Family Child Care Providers Role Modeling

**Theme 1: Providers Believe Healthful Eating and Physical Activity Are Important**

204 Across all focus groups, providers appeared aware of the benefits of eating healthfully  
205 and being physically active and believed that these practices are an integral influence on one's  
206 overall health. As one provider explained:

207 "Eating well and being physically active is an important part of being healthy. Past  
208 generations have known this for ages."

209 Overwhelmingly, providers believed in the importance of healthful eating and being  
210 physically active for children's overall health and socio-emotional wellbeing. As one provider  
211 said:

212 "Healthy eating and being physically active are very important for children's health and  
213 well-being.... Children are growing and learning and developing these habits while they  
214 are young. These [behaviors] will help them later in life."

**Theme 2: Providers Recognize Their Eating and Physical Activity Habits Could Improve**

216 Nearly all providers spoke of needing to improve their personal eating and physical  
217 activity habits because these behaviors would promote weight loss and ultimately improve their  
218 overall health. One provider stated:

219 "I know I need to improve my eating habits, start eating more healthy foods, and keep  
220 away from the junk food. I know that if I change the way I eat, I will lose some weight,  
221 and I really need to do that for my health."

222 Several providers discussed struggling with excessive weight, and a few described their  
223 unhealthy weight status as affecting their energy levels and overall health, with a few expressing  
224 concerns for their current health status. One provider stated:

## Latino Family Child Care Providers Role Modeling

225 “Since I had my kids and gained weight, I have tried to lose, but it’s not easy. You lose  
226 the weight and then gain it again.”

227 Another provider mentioned:

228 “I would like to lose some weight and be more active. I know I need to do it. I am aware  
229 that my weight is a problem and that it affects my health.”

230 Moreover, most providers reported being told by their healthcare providers that they  
231 needed to lose weight to improve their overall health issues (e.g., arthritis, hypertension, type 2  
232 diabetes, etc.). As one provider stated:

233 “The last time I saw my doctor, he told me I needed to lose weight if I did not want to  
234 become diabetic ... so, I am trying for my health.”

235 ***Theme 3: Personal Barriers to Healthful Eating and Physical Activity Behaviors***

236 Providers discussed daily life obligations such as work, competing demands, and limited  
237 resources as being barriers to being healthy. One provider said:

238 “You know, I always say, we are in the business of taking care of others, we are not good  
239 about taking care of ourselves even though we know we need to ... there is very little  
240 time ... and when there is any time, you are just tired.”

241 Another provider added:

242 “I have a busy schedule with work, and when I am not working, I am trying to take care  
243 of the house, my family. It’s a busy life. There’s barely any time for taking care of  
244 myself .... Just taking time off to go to a doctor’s appointment is difficult.”

245 Another provider explained:

246 “You get caught up with work and daily life, and at the end, there is little time to take  
247 care of oneself.”

## Latino Family Child Care Providers Role Modeling

1  
2  
3 248 Some providers spoke of attempting to change their personal eating and physical activity  
4  
5  
6 249 habits without success, and a few voiced a lack of confidence in their ability to overcome the  
7  
8 250 obligations and demands of day-to-day life to focus on and succeed in this change. One provider  
9  
10 251 mentioned:

11  
12 252 “You know, I have tried many times. It starts well. I plan my food in advance, I start  
13  
14  
15 253 going for walks, but then something happens, and it gets me off track and when I realize,  
16  
17 254 I am back to the same old habits.... It’s hard when you have to take care of so many  
18  
19  
20 255 things, with long and demanding working hours, and you don’t have the time to focus on  
21  
22 256 yourself.”

23  
24 257 When asked to think about how their jobs as FCCH providers and education and training  
25  
26  
27 258 opportunities to learn about healthful eating and physical activity impacted their personal health  
28  
29 259 lifestyles, several providers responded that although they know about the importance of healthful  
30  
31 260 eating and physical activity, this knowledge did not translate into their being physically active  
32  
33  
34 261 and eating healthfully. Providers appeared aware that their knowledge was important, but it was  
35  
36 262 not sufficient to change their behaviors. As one provider said:

37  
38 263 “It’s, what they say, it’s easier said than done .... We know it’s important to eat healthy  
39  
40 264 and be physically active and not sit around and just watch TV, etcetera, but putting these  
41  
42  
43 265 to practice is not as easy as just saying it.”

44  
45  
46 266 ***Theme 4: Providers Are Confident in Their Abilities to Help Children Develop Healthful***

47  
48 267 ***Eating and Physical Activity Habits***

49  
50 268 Across all focus groups, Latino providers spoke of their influential role in educating  
51  
52  
53 269 children about healthful eating and physical activity habits. As one provider said:

## Latino Family Child Care Providers Role Modeling

1  
2  
3 270 “We are teaching the children not only how to get along with one another, but we teach  
4  
5  
6 271 them that it’s important to eat healthy, to be active and healthy! .... I have parents thank  
7  
8 272 me for teaching their children how to be healthy. The parents don’t have the time. They  
9  
10 273 are not with the kids during the day. They get home and they are tired; after working long  
11  
12 274 hours, they don’t have time.”

13  
14  
15 275 Providers mentioned using strategies such as telling the children about the importance of  
16  
17 276 being healthy—eating healthfully and being active. One provider stated:

18  
19  
20 277 “I am always telling the children that it’s really important to eat healthy foods and be  
21  
22 278 active if they want to grow up and be healthy.”

23  
24 279 Most providers spoke of being confident about their abilities to help children develop  
25  
26  
27 280 healthful eating and physical activity habits. Providers saw themselves as being educators with  
28  
29 281 the necessary knowledge to teach children and their families about healthful diets and physical  
30  
31 282 activity. One provider said:

32  
33  
34 283 “I feel very confident in my ability to help the children be healthy—eat well, be active....  
35  
36 284 We are always going to trainings, reading the materials; we have to keep well informed.”

37  
38  
39 285 ***Theme 5: Providers View Themselves as Role Models***

40  
41 286 Providers spoke of being role models for children in their care, despite the majority  
42  
43 287 acknowledging that their own eating and physical activity health behaviors need to improve. As  
44  
45 288 one provider stated:

46  
47  
48 289 “We know that it’s important that we set a good example for the children, and I try my  
49  
50 290 best. We want to do the right thing for the children, even if you don’t do it for yourself.”

51  
52  
53 291 Another provider added:

## Latino Family Child Care Providers Role Modeling

292 “It’s important for the children to see us [adults] choosing healthy foods. Children want  
293 to copy what others do ... so if they see you eating fruits, they will want to eat fruits, but  
294 if they see you eating chips, that’s what they will want to eat.”

295 Finally, some providers reported that improving their own personal eating and physical  
296 activity behaviors would make them better role models for children. As one provider mentioned:

297 “Kids observe what we [adults] do, and they learn by seeing and copying what we  
298 [adults] do. So, I do all I can to help and teach the children to eat healthy and be  
299 physically active, but I know that if I am not doing it, it does not set a good example for  
300 them. I know that if they see me eating healthy and being active, they will want to eat  
301 healthy and be active ... they copy our [adults] habits.”

**DISCUSSION**

303 This study explored how Latino FCCH providers perceive their role in promoting  
304 healthful eating and physical activity behaviors for children attending FCCHs. Despite the  
305 growing interest in FCCHs as an important social setting that contributes to young children’s  
306 early eating and physical activity habits and prevention of child obesity, to date limited research  
307 has explored how FCCH providers view their ability to serve as role models for these health  
308 behaviors of young children in these settings. In addition, to our knowledge, none have focused  
309 on Latino FCCH providers. This information is needed given that FCCH providers care for a  
310 large number of racial/ethnic minority children, including Latinos—a group at high risk of  
311 childhood obesity. It is particularly important given that health-related behaviors learned early in  
312 life are likely to persist, as children get older.<sup>2,3,10</sup>

313 Latino providers participating in this qualitative study viewed themselves as being  
314 knowledgeable about nutrition and physical activity and playing an influential role in helping

## Latino Family Child Care Providers Role Modeling

1  
2  
3 315 children in their care develop and maintain healthful eating and physical activity habits.  
4  
5 316 Nonetheless, the majority of providers reported that their own eating and physical activity  
6  
7 317 behaviors needed to improve. These findings are consistent with a recent study conducted with a  
8  
9 318 convenience sample of 166 FCCH providers in North Carolina that found that almost all  
10  
11 319 providers (89.8%) were overweight or obese; approximately half did not meet guidelines for  
12  
13 320 physical activity and fruit and vegetable intake.<sup>28</sup>  
14  
15

16  
17 321 Social cognitive theory posits that behaviors are influenced by many factors with one of  
18  
19 322 them being observational learning. Therefore, improving Latino providers' health behaviors  
20  
21 323 would not only be beneficial for the providers' own health status, but would also be an important  
22  
23 324 target in the promotion of children's healthful eating and physical activity behaviors.<sup>29-31</sup> Our  
24  
25 325 findings suggest that providers perceive their own behaviors as having an influence on the  
26  
27 326 children they take care of and acknowledge that their behaviors need to improve. Providers also  
28  
29 327 believed that improving their own eating and physical activity habits would make them better  
30  
31 328 role models for children in their care. This finding is important and should be considered when  
32  
33 329 designing interventions to prevent obesity among children attending FCCHs to incorporate not  
34  
35 330 only targeting children's behaviors but also targeting those of providers.  
36  
37  
38

39  
40 331 Most providers in the current study reported lack of time and resources as being barriers  
41  
42 332 to improving their own personal eating and physical activity behaviors. FCCH providers need  
43  
44 333 time, resources, and support to improve their own eating and physical activity habits.  
45  
46 334 Interventions and policies aimed at improving the eating and physical activity environments of  
47  
48 335 FCCHs should target providers' personal behaviors and incorporate training resources and  
49  
50 336 support that promote behavioral change of providers' own eating and physical activity and  
51  
52 337 improve their weight status.  
53  
54  
55  
56  
57  
58  
59  
60



## Latino Family Child Care Providers Role Modeling

1  
2  
3 338 Findings from the present study add to the scant literature examining FCCH providers'  
4  
5 339 personal health behaviors and highlight the need for increased attention to FCCH providers' own  
6  
7 340 health behaviors as a means of promoting providers' own health as well as healthful eating and  
8  
9 341 physical activity among young children in these settings.

10  
11 342 Study results should be considered in light of some limitations. Findings are based on a  
12  
13 343 nonrandom, purposive, and relatively small sample of low-income, Latino FCCH providers in  
14  
15 344 four selected communities in MA. Furthermore, FCCH providers who participated in this study  
16  
17 345 may have been more aware of and more concerned with promoting health behaviors among  
18  
19 346 children in their care and more aware of their own health behaviors. Future research can address  
20  
21 347 these limitations by exploring influences on Latino providers' beliefs, attitudes, and practices  
22  
23 348 from other communities across the United States. In addition, quantitative research that builds on  
24  
25 349 the qualitative findings reported here is needed to quantify Latino providers' own eating and  
26  
27 350 physical activity behaviors and quantify how these behaviors may influence the eating and  
28  
29 351 physical activity behaviors of preschool children attending FCCHs.

**352 CONCLUSION**

353 Given evidence of the important role of FCCH providers in promoting healthful eating  
354 and physical activity of young children under their care and evidence from the general literature  
355 of the importance of a caregiver's role modeling in influencing children's behaviors, health  
356 promotion interventions targeting FCCH settings should consider health promotion activities for  
357 FCCH providers' personal eating and physical activity behaviors. It is likely that these efforts  
358 would not only result in improvements of FCCH providers own healthful eating and physical  
359 activity behaviors but also have the potential to further promote healthful eating and physical  
360 activity behaviors and health outcomes of children attending FCCHs.

## Latino Family Child Care Providers Role Modeling

361 **Abbreviations**

362 ECE: Early Care and Education; FCCHs: Family Child Care Homes; SCT: Social Cognitive  
 363 Theory; MA: Massachusetts; GED: General Educational Diploma.

364

365 **REFERENCES**

- 366
- 367 1. Ogden, C. L., Carroll, M. D., & Flegal, K. M. (2014). Prevalence of obesity in the United  
 368 States. *JAMA*, *312*(2), 189-190. doi:10.1001/jama.2014.6228
  - 369 2. Larson, N., Ward, D. S., Neelon, S. B., & Story, M. (2011). What role can child-care settings  
 370 play in obesity prevention? A review of the evidence and call for research efforts.  
 371 *Journal of the American Dietetic Association*, *111*, 1343-1362.
  - 372 3. Sisson, S.B., Krampe, M. Anundson, K., & Castle, S. (2016). Obesity prevention and  
 373 obesogenic behavior interventions in child care: A systematic review. *Preventive Medicine*,  
 374 *87*, 57-69. doi:10.1016/j.ypmed.2016.02.016
  - 375 4. Child Care Aware of America. (2016). *Child care in America: 2016 state fact sheets*.  
 376 Retrieved from [http://usa.childcareaware.org/advocacy-public-policy/resources/reports-](http://usa.childcareaware.org/advocacy-public-policy/resources/reports-and-research/statefactsheets/)  
 377 [and-research/statefactsheets/](http://usa.childcareaware.org/advocacy-public-policy/resources/reports-and-research/statefactsheets/)
  - 378 5. Centers for Disease Control and Prevention (CDC). (2011). Early child care and education  
 379 (ECE). Atlanta, GA: Author.
  - 380 6. Laughlin, L. (2013). *Who's minding the kids? Child care arrangements: Spring 2011* (Report  
 381 No. P70-135, U.S. Department of Commerce, U.S. Census Bureau). Retrieved from  
 382 <http://www.census.gov/content/dam/Census/library/publications/2013/demo/p70-135.pdf>
  - 383 7. Daugherty, L. (2010). *Child care choices of Hispanic families: Why aren't families using child  
 384 care?* (Doctoral dissertation). Retrieved from [http://www.rand.org/pubs/rgs\\_  
 385 dissertations/RGSD258.html](http://www.rand.org/pubs/rgs_dissertations/RGSD258.html)
  - 386 8. Lindsay, A. C., Greaney, M. L., Wallington, S. F., Sands, F. D., Wright, J. A., & Salkeld, J.  
 387 (2017). Latino parents' perceptions of the eating and physical activity experiences of  
 388 their pre-school children at home and at family child-care homes. *Public Health  
 389 Nutrition*, *20*(2), 346-356. doi:10.1017/S136898001600207X
  - 390 9. Lindsay, A. C., Salkeld, J. A., Greaney, M. L., & Sands, F. D. (2015). Latino family child care  
 391 providers' beliefs, attitudes and practices related to promotion of healthy behaviors  
 392 among preschool children: A qualitative study. *Journal of Obesity*, *2015*.  
 393 doi:10.1155/2015/409742.
  - 394 10. Story, M., Kaphingst, K. M., & French, S. (2006). The role of child care settings in obesity  
 395 prevention. *Future Child*, *16*(1), 143-168.
  - 396 11. Erinosh, T. O., Hales, D. P., McWilliams, C. P., Emunah, J., & Ward, D. S. (2012).  
 397 Nutrition policies at child-care centers and impact on role modeling of healthy eating  
 398 behaviors of caregivers. *Journal of the Academy of Nutrition and Dietetics*, *112*(1), 119-  
 399 124. doi:10.1016/j.jada.2011.08.048
  - 400 12. Ward, S., Bélanger, M., Donovan, D., & Carrier, N. (2015). Systematic review of the  
 401 relationship between childcare educators' practices and preschoolers' physical

## Latino Family Child Care Providers Role Modeling

- 1  
2  
3 402 activity and eating behaviours. *Obesity Review*, 16(12), 1055-1070.  
4 403 doi:10.1111/obr.12315  
5 404  
6 405 13. Bandura, A. (2001). Social cognitive theory: An agentic perspective. *Annual Review of*  
7 406 *Psychology*, 52, 1-26. doi:10.1146/annurev.psych.52.1.1  
8 407  
9 408 14. Bandura, A. (2004). Health promotion by social cognitive means. *Health Education &*  
10 409 *Behavior*, 31, 143-164. doi:10.1177/1090198104263660  
11 410  
12 411 15. Bandura, A. (2006). Toward a psychology of human agency. *Perspectives on Psychological*  
13 412 *Science*, 1, 164-180. doi:10.1111/j.1745-6916.2006.00011.x  
14 413  
15 414 16. Bandura, A. (1986) Social foundations of thought and action. Englewood Cliffs, NJ. Prentice  
16 415 Hall.  
17 416 17. Mann, C. M., Ward, D. S., Vaughn, A., Benjamin Neelon, S. E., Long Vidal, L. J., Omar,  
18 417 S.,... Østbye, T. (2015). Application of the intervention mapping protocol to develop  
19 418 Keys, a family child care home intervention to prevent early childhood obesity. *BMC*  
20 419 *Public Health*, 10(15), 1227. doi:10.1186/s12889-015-2573-9  
21 420  
22 421 18. Fees, B., Trost, S., Bopp, M., & Dzewaltowski, D. A. (2009). Physical activity programming  
23 422 in family child care homes: Providers' perceptions of practices and barriers. *Journal of*  
24 423 *Nutrition Education and Behavior*, 41(4), 268-273. doi:10.1016/j.jneb.2008.01.013  
25 424  
26 425 19. Lawrence, S., Schwarte, L., Samuels, S., & McCarthy, W. J. (2009). Health care providers'  
27 426 perceived role in changing environments to promote healthy eating and physical activity:  
28 427 Baseline findings from health care providers participating in the healthy eating, active  
29 428 communities program. *Pediatrics*, 123(Suppl 5), S293-300. doi:10.1542/peds.2008-2780H  
30 429  
31 430 20. Østbye, T., Mann, C. M., Vaughn, A. E., Namenek Brouwer, R. J., Benjamin Neelon, S.  
32 431 E., Hales, D.,... Ward, D. S. (2015). The keys to healthy family child care homes  
33 432 intervention: Study design and rationale. *Contemporary Clinical Trials*, 40, 81-89.  
34 433 doi:10.1016/j.cct.2014.11.003  
35 434  
36 435 21. Tovar, A., Risica, P., Mena, N., Lawson, E., Ankoma, A., & Gans, K. M. (2015). An  
37 436 assessment of nutrition practices and attitudes in family child-care homes: Implications  
38 437 for policy implementation. *Preventing Chronic Disease*, 4(12), E88.  
39 438 doi:10.5888/pcd12.140587  
40 439  
41 440 22. Trost, S. G., Messner, L., Fitzgerald, K., & Roths, B. (2011). A nutrition and physical  
42 441 activity intervention for family child care homes. *American Journal of Preventive*  
43 442 *Medicine*, 41(4), 392-398. doi:10.1016/j.amepre.2011.06.030  
44 443  
45 444 23. de Silva-Sanigorski, A., Elea, D., Bell, C., Kremer, P., Carpenter, L., Nichols,  
46 445 M.,... Swinburn, B. (2011). Obesity prevention in the family day care setting: Impact of  
47 446 the Romp & Chomp intervention on opportunities for children's physical activity and  
48 447 healthy eating. *Child Care Health and Development*, 37(3), 385-393. doi:10.1111/j.1365-  
49 448 2214.2010.01205.x  
50 449  
51 450 24. Tucker, P., Vanderloo, L. M., Burke, S. M., Irwin, J. D., & Johnson, A. M. (2015).  
52 451 Prevalence and influences of preschoolers' sedentary behaviors in early learning centers:  
53 452 A cross-sectional study. *BMC Pediatrics*, 18(15), 128. doi:10.1186/s12887-015-0441-5  
54 453  
55 454 25. Vaismoradi, M., H. Turunen, and T. Bondas. (2013). Content analysis and thematic analysis:  
56 455 Implications for conducting a qualitative descriptive study. *Nurs Health Sci*.  
57 456 15(3):398-405. doi:10.1111/nhs.12048.  
58 457  
59 458 26. Silverman, D. (2006). *Interpreting Qualitative Data: Methods for Analysing Talk, Text and*  
60 459 *Interaction* (3rd ed.). London: Sage.

## Latino Family Child Care Providers Role Modeling

- 1  
2  
3 447 27. Ritchie J, Spencer L, O'Connor W. (2004). Carrying out qualitative analysis. In Ritchie J,  
4 448 Lewis J (eds) *Qualitative research practice*. pp 219–262. London: Sage Publications.  
5 449 28. Tovar, A., Vaughn, A. E., Grummon, A., Burney, R., Erinosh, T., Østbye, T., & Ward, D. S.  
6 450 (2016). Family child care home providers as role models for children: Cause for concern?  
7 451 *Preventive Medicine Reports*, 14(5), 308-313. doi:10.1016/j.pmedr.2016.11.01.  
8 452 29. Brown, R., & Ogden, J. (2004). Children's eating attitudes and behavior: A study of the  
9 453 modeling and control theories of parental influence. *Health Education Research*, 19(3),  
10 454 261-271.  
11 455 30. Hendy, H. M., & Raudenbush, B. (2000). Effectiveness of teacher modeling to encourage  
12 456 food acceptance in preschool children. *Appetite*, 34(1), 61-76.  
13 457 doi:10.1006/appe.1999.0286  
14 458 31. Nicklas, T. A., Baranowski, T., Baranowski, J. C., Cullen, K., Rittenberry, L., & Olvera, N.  
15 459 (2001). Family and child-care provider influences on preschool children's fruit, juice, and  
16 460 vegetable consumption. *Nutrition Reviews*, 59(7), 224-235. doi:10.1111/j.1753-  
17 461 4887.2001.tb07014.x  
18 462  
19 463

peer review only

# BMJ Open

## Easier Said Than Done: A Qualitative Study Conducted in the U.S. Exploring Latino Family Child Care Home Providers as Role Models for Healthy Eating and Physical Activity Behaviors

|                                 |                                                                                                                                                                                                                                                                                                                                                    |
|---------------------------------|----------------------------------------------------------------------------------------------------------------------------------------------------------------------------------------------------------------------------------------------------------------------------------------------------------------------------------------------------|
| Journal:                        | <i>BMJ Open</i>                                                                                                                                                                                                                                                                                                                                    |
| Manuscript ID                   | bmjopen-2017-018219.R1                                                                                                                                                                                                                                                                                                                             |
| Article Type:                   | Research                                                                                                                                                                                                                                                                                                                                           |
| Date Submitted by the Author:   | 04-Aug-2017                                                                                                                                                                                                                                                                                                                                        |
| Complete List of Authors:       | Lindsay, AC; University of Massachusetts Boston, Department of Exercise and Health Sciences; Department of Nutrition<br>Greaney, Mary ; University of Rhode Island,<br>Wallington, Sherrie; Georgetown University, Oncology; Georgetown University, Oncology<br>Wright, Julie A.; University of Massachusetts Boston, Exercise and Health Sciences |
| <b>Primary Subject Heading</b>: | Qualitative research                                                                                                                                                                                                                                                                                                                               |
| Secondary Subject Heading:      | Qualitative research, Public health                                                                                                                                                                                                                                                                                                                |
| Keywords:                       | PREVENTIVE MEDICINE, QUALITATIVE RESEARCH, PUBLIC HEALTH                                                                                                                                                                                                                                                                                           |
|                                 |                                                                                                                                                                                                                                                                                                                                                    |

SCHOLARONE™  
Manuscripts

Latino Family Child Care Providers as Role Models

**Running head:** Latino Family Child Care Providers as Role Models

**Easier Said Than Done: A Qualitative Study Conducted in the U.S. Exploring Latino Family Child Care Home Providers as Role Models for Healthy Eating and Physical Activity Behaviors**

Ana Cristina Lindsay<sup>1,2</sup>, Mary L. Greaney<sup>3</sup>, Sherrie F. Wallington<sup>4</sup>, Julie A. Wright<sup>1</sup>

<sup>1</sup> University of Massachusetts Boston, Exercise and Health Sciences Department, College of Nursing and Health Sciences, Boston, MA, USA.

<sup>2</sup> Harvard T.H. Chan School of Public Health, Department of Nutrition, Boston, MA, USA.

<sup>3</sup> University of Rhode Island, Health Studies & Department of Kinesiology, Kingston, RI, USA

<sup>4</sup> Lombardi Comprehensive Cancer Center, Georgetown University Medical Center, Washington, DC, USA

**Authors' Email Address:**

Ana Cristina Lindsay: Ana.Lindsay@umb.edu

Mary L. Greaney: mgreaney@uri.edu

Sherrie F. Wallington: slw49@georgetown.edu

Julie A. Wright: Julie.Wright@umb.edu

**Address for Correspondence (Permanent address):**

Ana Cristina Lindsay, DDS, MPH, DPH

Associate Professor, Exercise and Health Sciences Department

University of Massachusetts Boston

100 Morrissey Boulevard, Boston, MA 02125

Phone: 617-287-7579

Email: Ana.Lindsay@umb.edu

**Abstract word count:** 312 words

**Main text word count:** 3,883 words

**Tables and figures:** 0

**Number of references:** 31

## Latino Family Child Care Providers as Role Models

40 **Disclosure Statements**

41  
42 **Acknowledgments:** The authors are grateful for the assistance of personnel at Massachusetts  
43 Department of Early Education and Care, Child Care Circuit, Family Care Systems, and CACFP,  
44 especially “Yours for Children, Inc.” The authors are thankful to the FCCH providers and  
45 parents who participated in this study and to Ms. Amina Hetu for her collaboration in conducting  
46 the focus groups.

47  
48 **Financial Support:** This study was supported by a grant from Aetna Foundation Inc. (Grant no.  
49 11-02395), for which Ana Lindsay, DDS, MPH, DPH, is Principal Investigator.

50  
51 **Conflict of Interest:** The authors declare that there is no conflict of interests regarding the  
52 publication of this paper.

53  
54 **Authorship:** ACL in study design, data collection, data analysis, and manuscript preparation and  
55 review. MLG in study design, manuscript preparation, and manuscript review. SFW in  
56 development of theoretical framework for the study, manuscript preparation, and manuscript  
57 review. JAW in manuscript preparation and manuscript review.

58  
59 **Ethical Standards Disclosure:** This study was approved by the Institutional Review Board for  
60 the Protection of Human Subjects at the Harvard T. H. Chan School of Public Health. Written  
61 and oral informed consent was obtained from all participants.

62  
63 **Data Sharing:** Data and all other materials for this study are kept at the Department of Exercise  
64 and Health Sciences, University of Massachusetts Boston. The datasets generated during and/or  
65 analyzed during the current study are not publicly available due the terms of consent to which  
66 participants agreed to, but are available from the corresponding author on reasonable request.

## Latino Family Child Care Providers as Role Models

67 **ABSTRACT**

68 **Objective:** Latinos are the largest and most rapidly growing minority population group in the  
69 United States (U.S.) and are disproportionately affected by obesity and related chronic diseases.  
70 Child care providers likely influence the eating and physical activity behaviors of children in  
71 their care on a daily basis and therefore are important targets for interventions designed to  
72 prevent childhood obesity. Nonetheless, there is a paucity of research examining the behaviors of  
73 Family Child Care Home (FCCH) providers and how they model healthy eating and physical  
74 activity behaviors. Therefore, this study explored Latino FCCH providers' beliefs and practices  
75 related to healthy eating, physical activity and sedentary behaviors, and how they view their  
76 ability to serve as role models for these behaviors for young children in their care.

77 **Methods:** A qualitative study consisting of six focus groups conducted in Spanish with a sample  
78 of 44 state-licensed Latino FCCH providers in the state of Massachusetts, United States.  
79 Translated transcripts were analyzed using thematic analyses to code data in phases to identify  
80 meaningful patterns.

81 **Results:** Analyses revealed that Latino FCCH providers have positive beliefs and attitudes about  
82 the importance of healthy eating and physical activity for children in their care, but struggle  
83 themselves with these same behaviors, and maintaining a healthy weight status. The ability of  
84 Latino FCCH providers to model healthy eating and physical activity may be limited by their  
85 self-efficacy to be physically active, eat a healthy diet, and maintain a healthy weight.

86 **Conclusions:** Interventions designed to improve healthy eating and physical activity behaviors  
87 of children enrolled in FCCHs should include components that address FCCH providers' own  
88 health behaviors, as well as their modeling of these health behaviors. Future research should  
89 build on the qualitative findings of this study by quantifying Latino providers' own healthy



## Latino Family Child Care Providers as Role Models

1  
2  
3 90 eating and physical activity behaviors, and determining how these behaviors influence behaviors  
4  
5 91 and health outcomes of children in their care.  
6  
7

8 92 **Keywords:** Latino; role modeling; eating and physical activity; family child care homes;  
9  
10 93 preschoolers.  
11  
12

13 94

14  
15 95 **Strengths and limitations of this study:**  
16

- 17 96
- 18 • Prior research documents that child care providers influence the eating and physical  
19 activity behaviors of children in their care on a daily basis and therefore are important  
20 97 targets for interventions aimed at prevention of childhood obesity in child care settings.  
21 98
  - 22 • To our knowledge, this is the first study to examine Latino family child care home  
23 99 (FCCH) providers' view of their ability to serve as role models for healthy eating and  
24 100 physical activity behaviors of children in these settings.  
25 101
  - 26 • Findings revealed Latino FCCH providers have positive beliefs and attitudes about the  
27 102 importance of healthy eating and physical activity for children in their care, and overall  
28 103 are knowledgeable about these behaviors, but struggle with eating a healthy diet, being  
29 104 physically active, and maintaining a healthy weight. Providers reported lack of time and  
30 105 daily life demands, including work, as main barriers to focusing on their own health  
31 106 behaviors and weight status. Several providers expressed the desire to change their eating  
32 107 and physical activity habits and to improve their personal health.  
33 108
  - 34 • Interventions and policies aimed at improving eating and physical activity behaviors of  
35 109 children attending FCCHs should target providers' self-efficacy and personal behaviors  
36 110 by providing training resources and support providers' changing their own eating and  
37 111 physical activity behaviors and improving their weight status.  
38 112
- 39  
40  
41  
42  
43  
44  
45  
46  
47  
48  
49  
50  
51  
52  
53  
54  
55  
56  
57  
58  
59  
60

## Latino Family Child Care Providers as Role Models

- 1  
2  
3 113      • Findings from the present study add to the scant literature examining FCCH providers’  
4  
5 114      personal health behaviors and highlight the need for increased attention to FCCH  
6  
7 115      providers’ own health behaviors as a means of promoting providers’ own health as well  
8  
9 116      as healthy eating and physical activity among young children in these settings.  
10  
11 117      • Study results should be considered in light of some limitations. Findings are based on a  
12  
13 118      nonrandom, purposeful, and relatively small sample of low-income, Latino FCCH  
14  
15 119      providers in four selected communities in Massachusetts, United States, which limits  
16  
17 120      generalizability. There is possibility of selection bias as it may be that providers with a  
18  
19 121      heightened interest in promoting health behaviors were more willing to take part in the  
20  
21 122      study. In addition, providers aware of the importance of health behaviors may have been  
22  
23 123      inclined to give socially desirable responses.  
24  
25  
26  
27  
28  
29  
30  
31  
32  
33  
34  
35  
36  
37  
38  
39  
40  
41  
42  
43  
44  
45  
46  
47  
48  
49  
50  
51  
52  
53  
54  
55  
56  
57  
58  
59  
60

## Latino Family Child Care Providers as Role Models

124 **INTRODUCTION**

125 Latinos are the largest and most rapidly growing minority population group in the United  
126 States (U.S.)<sup>1</sup> and are disproportionately affected by obesity and related chronic diseases.<sup>2</sup>  
127 Although recent data indicate a decrease in rates of child obesity in the U.S., it remains a  
128 significant health problem.<sup>3</sup> Children in low-income Latino families are at elevated risk of  
129 becoming overweight and obese, making childhood obesity among Latinos a pressing public  
130 health concern as childhood weight status tracks into adulthood.<sup>3</sup> Substantive efforts are needed  
131 to prevent and control obesity among Latino children if future trends in chronic diseases are to be  
132 altered in this population.

133 Early care and education (ECE) settings are important social environments that influence  
134 the eating and physical activity behaviors of children attending these institutions.<sup>4,5</sup> Increasing  
135 ECE attendance rates and time spent in these settings make ECEs important venues for health  
136 promotion and obesity prevention interventions targeting young children.<sup>6</sup> Family Child Care  
137 Homes (FCCHs) are a type of ECE setting where providers care for children other than their own  
138 in their own home.<sup>6,7</sup> More than 1.9 million preschool children attend FCCHs, and this ECE  
139 setting is the second largest provider of non-relative care for children up to 5 years old in the  
140 United States.<sup>8</sup>

141 Latino families may prefer FCCHs to other ECE settings due to cultural preferences for  
142 family-like care, flexible hours, and lower costs, thus making FCCHs an ideal setting for obesity  
143 prevention efforts designed for Latino families and children.<sup>9</sup> Latino parents who enroll their  
144 children in an FCCH believe that these settings are instrumental in shaping and reinforcing their  
145 children's healthy eating and physical activity habits.<sup>10,11</sup> In fact, recent research suggests that  
146 FCCH providers may be more influential than, or equally as important as, parents in shaping

## Latino Family Child Care Providers as Role Models

1  
2  
3 147 food preferences of young children.<sup>5,12</sup> FCCH providers, like parents, help establish and  
4  
5 148 reinforce early healthy eating and physical activity behaviors among young children on a daily  
6  
7  
8 149 basis by developing an FCCH environment that fosters healthy behaviors.<sup>12,13</sup> FCCH providers  
9  
10 150 influence behavior in many ways (e.g., knowledge of nutrition and physical activity, selection of  
11  
12 151 daily activities, food selection, meal structure, etc.).<sup>12,13</sup> Research suggests that children model  
13  
14 152 the behaviors of others and that this modeling helps young children develop lifelong habits that  
15  
16 153 contribute to healthy weight or to overweight and obesity.<sup>14</sup> Social cognitive theory (SCT) posits  
17  
18 154 that behavior acquisition is directly related to observing others within the context of social  
19  
20 155 interactions and experiences.<sup>15,16,17</sup> Bandura<sup>17</sup> suggests that children learn through observing the  
21  
22 156 behaviors of others and the reinforcements they receive. Many types of behaviors, including  
23  
24 157 eating and physical activity, can be learned through observing influential others such as  
25  
26 158 caregivers and peers. For children attending FCCHs, the FCCH provider may be a particularly  
27  
28 159 influential role model for healthy behaviors.<sup>18</sup>

34 160 Much of the obesity prevention research in FCCH settings has focused on improving the  
35  
36 161 eating and physical activity environments of these settings and changing providers' feeding and  
37  
38 162 physical activity practices.<sup>11,19-23</sup> For example, providers' beliefs, attitudes, and practices related  
39  
40 163 to these health behaviors have been examined to identify potential targets for intervention.<sup>19,22-26</sup>  
41  
42 164 However, there is a paucity of research examining FCCH providers' personal eating and physical  
43  
44 165 activity behaviors and how these behaviors may influence the behaviors of children in their care.  
45  
46 166 Therefore, this qualitative study explored Latino FCCH providers' beliefs and practices related  
47  
48 167 to healthy eating, physical activity and sedentary behaviors, and how providers view their ability  
49  
50 168 to serve as role models for these behaviors for young children in their care.  
51  
52

**169 METHODS**

Latino Family Child Care Providers as Role Models

1  
2  
3 170 ***Study Design, Setting, and Sample***  
4

5 171 This study was part of a larger multi-component exploratory qualitative research project  
6  
7  
8 172 guided by the socio-ecological model to systematically explore multi-level factors influencing  
9  
10 173 eating, physical activity, and sedentary behaviors among Latino preschool-age children (2-5  
11  
12 174 years) attending FCCHs in Massachusetts (MA).<sup>10,11</sup> Recognizing the value of qualitative  
13  
14 175 methodology in formative research, we employed a focus group design with a phenomenological  
15  
16 176 approach to both data collection and analysis with the purpose of understanding providers'  
17  
18 177 perceptions, perspectives and understandings of their ability to serve as role models for health  
19  
20 178 behaviors (e.g., physical activity and healthy eating) of children in their care (phenomenon).  
21  
22 179 Focus group discussions (FGD) were conducted because they are an important technique for  
23  
24 180 conducting research in diverse cultural settings and provide valuable information.<sup>27</sup> Moreover,  
25  
26 181 the synergistic effects of the group setting elicit ideas and discussions that may not arise in  
27  
28 182 individual interviews.<sup>28</sup>  
29  
30  
31  
32  
33

34 183 As noted in previous studies, FCCH regulators were identified and contacted by research  
35  
36 184 staff to help develop a list of licensed FCCH from four areas in Massachusetts (North Shore,  
37  
38 185 Greater Boston, Central, and Western).<sup>10,11</sup> Using this compiled list of licensed FCCH providers,  
39  
40 186 22 licensed providers were randomly selected from each of the four areas of Massachusetts (total  
41  
42 187 88 providers) and each selected provider was mailed a flyer in Spanish outlining the study that  
43  
44 188 included a phone number to call for additional information. Interested providers were screened  
45  
46 189 for eligibility (e.g., self-identified as Latino, having at least three children aged 2–5 in the  
47  
48 190 FCCH). A confirmatory/reminder phone call was made one to two days before the scheduled  
49  
50 191 FGD.  
51  
52  
53  
54  
55  
56  
57  
58  
59  
60

## Latino Family Child Care Providers as Role Models

192 ***Data Collection***

193 A native Spanish speaker trained in qualitative research methods moderated all FGD in  
194 Spanish with assistance from the first author, using a piloted discussion guide with open-ended  
195 questions and probes. The pilot-tested guide explored FCCH providers': (1) beliefs and attitudes  
196 related to eating and physical activity, (2) barriers to having and/or maintaining healthy eating  
197 and physical activity habits, (3) perceptions of their influence on the eating, physical activity and  
198 sedentary behaviors of children in their care, and (4) perception of their ability to serve as role  
199 models of healthy eating and physical activity behaviors for young children in their care. The  
200 same FGD guide was used for all FGDs.

201 All FGDs were held in meeting rooms of public libraries between April and September  
202 2015, and lasted approximately 90 minutes. All FGDs were audiotaped after participants  
203 provided signed informed consent. Before each FGD, the moderator explained procedures and  
204 participants completed a brief, self-administered questionnaire assessing education, marital  
205 status, country of origin, and length of time living in the U.S. A bilingual (Spanish and English)  
206 qualitative researcher served as an assistant moderator (ACL) and took notes during each  
207 session. The moderator and assistant moderator convened for 15 minutes at the end of the FGD  
208 in a private room and discussed any new or recurring themes heard during the session, which  
209 were entered into a grid of major themes and subthemes. This grid system was used to closely  
210 follow the emergence of new themes and subthemes and to determine when data saturation was  
211 achieved.

212 Participants received a \$25 gift card for their participation. This study was approved by  
213 the Institutional Review Board for the Protection of Human Subjects of the Harvard T.H. Chan  
214 School of Public Health.

## Latino Family Child Care Providers as Role Models

215 **Data Analysis**

216           Audiotapes were transcribed verbatim in Spanish and translated into English without  
217 identifiers by a bilingual and native Spanish speaker using forward-backward techniques to  
218 establish semantic equivalence in translation. This process ensured that the integrity and  
219 equivalence of the data were not lost in the process of translation.

220           Transcripts were analyzed using thematic analyses, an iterative process of coding data in  
221 phases to identify meaningful patterns.<sup>28</sup> Analytic phases included data familiarization,  
222 generation of initial codes, identifying patterns and themes, and defining and naming themes.<sup>29,30</sup>  
223 Two authors, experienced qualitative researchers, independently coded all transcripts and  
224 identified emergent themes. These two authors then checked for consistency between their  
225 analyses and discussed any differences until consensus was reached. An inductive approach was  
226 employed, where emerging data was used to develop, refine and verify themes and findings.  
227 Descriptive statistics were calculated for the socio-demographic data using Microsoft Excel  
228 2008<sup>®</sup>.

229 **RESULTS**

230           Six FGDs with a total of 44 providers (41 female, 3 male), all of whom self-identified as  
231 Hispanic/Latino, were conducted before thematic saturation was reached, with no new themes or  
232 subthemes emerging during the sixth focus group. As seen in Table 1, about one third of  
233 participants had graduated from high school (n = 10; 22.7%) or earned their general education  
234 diploma (GED) (n = 4; 9.2%), and close to forty percent (n = 17; 38.5%) had attended some  
235 college. Approximately 95.5% were born outside of the U.S., and had lived in the U.S. for an  
236 average of 22 years. All reported Spanish was the main language spoken at home. Themes that

## Latino Family Child Care Providers as Role Models

237 emerged during the qualitative analyses are discussed in the following section, with quotes used  
238 to illustrate the themes.

**239 Theme 1: Providers Believe Healthy Eating and Physical Activity Are Important**

240 Across all focus groups, providers appeared aware of the benefits of eating healthy (e.g.,  
241 eating fruits and vegetables, avoiding “junk” food, drinking water and avoiding sugar-sweetened  
242 beverages, etc.) and being physically active, and believed that these practices are an integral  
243 influence on one’s overall health. As one provider explained:

244 “Eating well and being physically active is an important part of being healthy. Past  
245 generations have known this for ages.” Female Provider (FP) #10, Dominican Republic  
246 Overwhelmingly, providers believed in the importance of healthy eating and being  
247 physically active for children’s overall health and socio-emotional wellbeing. As one provider  
248 said:

249 “Healthy eating and being physically active are very important for children’s health and  
250 well-being.... Children are growing and learning and developing these habits while they  
251 are young. These [behaviors] will help them later in life.” FP#23, Mexico

252 Providers also recognized that children are exposed to and spend many hours on  
253 sedentary activities (e.g., video games, TV watching, use of electronics), and felt it was  
254 important to minimize the use of electronics.

255 “I don’t really allow any use of electronics. It’s really hard, but nowadays even little kids  
256 and babies have so much access to electronics. My policy is that kids cannot bring any  
257 electronics to daycare.” FP#11, Colombia

258 Furthermore, most providers felt that screen-time should be regulated, and several spoke  
259 of not allowing children to spend more than one hour of screen-time per day. Watching TV was



## Latino Family Child Care Providers as Role Models

260 the most common type of screen-time providers reported allowing children to have, and that they  
261 most often allowed this during transitions such as drop-off, pickup, and meal preparation. Some  
262 providers reported that they regulated screen-time in hopes of increasing children's PA.

263 "I feel that we need to regulate how much TV and electronics we allow to make sure that  
264 the kids are active. In our daycare we [couple-run FCCH] only allow it during drop-off  
265 and pick-up and sometimes when we both need to prepare lunch" Male Provider (MP)#3,  
266 Colombia

**Theme 2: Providers Recognize Their Eating and Physical Activity Habits Could Improve**

268 Nearly all providers spoke of needing to improve their own eating and physical activity  
269 habits, to promote weight loss and improve their overall health. One provider stated:

270 "I know I need to improve my eating habits, start eating more healthy foods, and keep  
271 away from the junk food. I know that if I change the way I eat, I will lose some weight,  
272 and I really need to do that for my health." FP#18, Dominican Republic

273 Several providers discussed struggling with excessive weight, and a few described their  
274 unhealthy weight status as affecting their energy levels and overall health, with a few expressing  
275 concerns for their current health status. One provider stated:

276 "Since I had my kids and gained weight, I have tried to lose, but it's not easy. You lose  
277 the weight and then gain it again." FP#6, Colombia

278 Another provider mentioned:

279 "I would like to lose some weight and be more active. I know I need to do it. I am aware  
280 that my weight is a problem and that it affects my health." FP#17, Puerto Rico

## Latino Family Child Care Providers as Role Models

281 Moreover, most providers reported being told by their healthcare providers that they  
282 needed to lose weight to improve various health issues (e.g., arthritis, hypertension, type 2  
283 diabetes, etc.). As one provider stated:

284 “The last time I saw my doctor, he told me I needed to lose weight if I did not want to  
285 become diabetic ... so, I am trying for my health.” FP#4, Guatemala

**286 Theme 3: Personal Barriers to Healthy Eating and Physical Activity Behaviors**

287 Providers discussed daily life obligations such as work, competing demands, and limited  
288 resources as being barriers to being healthy. One provider said:

289 “You know, I always say, we are in the business of taking care of others, we are not good  
290 about taking care of ourselves even though we know we need to ... there is very little  
291 time ... and when there is any time, you are just tired.” FP#38, Colombia

292 Another provider added:

293 “I have a busy schedule with work, and when I am not working, I am trying to take care  
294 of the house, my family. It’s a busy life. There’s barely any time for taking care of  
295 myself.... Just taking time off to go to a doctor’s appointment is difficult.” FP#8,  
296 Dominican Republic

297 Another provider explained:

298 “You get caught up with work and daily life, and at the end, there is little time to take  
299 care of oneself.” FP#33, Puerto Rico

300 Some providers spoke of attempting to change their personal eating and physical activity  
301 habits without success, and a few voiced a lack of confidence in their ability to overcome the  
302 obligations and demands of day-to-day life to focus on and succeed in this change. One provider  
303 mentioned:

## Latino Family Child Care Providers as Role Models

1  
2  
3 304 “You know, I have tried many times. It starts well. I plan my food in advance, I start  
4  
5 305 going for walks, but then something happens, and it gets me off track and when I realize,  
6  
7  
8 306 I am back to the same old habits.... It’s hard when you have to take care of so many  
9  
10 307 things, with long and demanding working hours, and you don’t have the time to focus on  
11  
12 308 yourself.” FP#2, Honduras

13  
14  
15 309 Furthermore, providers reported that although they were aware about the importance of  
16  
17 310 healthy eating and physical activity, this knowledge did not always translate into them being  
18  
19  
20 311 physically active and eating healthy. As one provider said:

21  
22 312 “It’s, what they say, it’s easier said than done... We know it’s important to eat healthy and  
23  
24 313 be physically active and not sit around and just watch TV, etcetera, but putting these to  
25  
26  
27 314 practice is not as easy as just saying it.” FP#12, Dominican Republic

28  
29 315 ***Theme 4: Providers Are Confident in Their Abilities to Help Children Develop Healthy Eating***  
30  
31  
32 316 ***and Physical Activity Habits***

33  
34 317 Across all FGDs, Latino providers spoke of their influential role in educating children  
35  
36 318 about healthy eating and physical activity habits. As one provider said:

37  
38  
39 319 “We are teaching the children not only how to get along with one another, but we teach  
40  
41 320 them that it’s important to eat healthy, to be active and healthy! .... I have parents thank  
42  
43 321 me for teaching their children how to be healthy. The parents don’t have the time. They  
44  
45  
46 322 are not with the kids during the day. They get home and they are tired; after working long  
47  
48 323 hours, they don’t have time.” FP#41, Colombia

49  
50 324 Providers mentioned using strategies such as telling the children about the importance of  
51  
52  
53 325 being healthy—eating healthy and being active. One provider stated:

## Latino Family Child Care Providers as Role Models

326 “I am always telling the children that it’s really important to eat healthy foods and be  
327 active if they want to grow up and be healthy.” FP#27, Peru

328 Most providers had high self-efficacy about their abilities to help children develop  
329 healthy eating and physical activity habits. Providers were confident in their ability to serve as  
330 educators with the necessary knowledge to teach children and their families about healthy diets  
331 and physical activity. One provider said:

332 “I feel very confident in my ability to help the children be healthy—eat well, be active....  
333 We are always going to trainings, reading the materials; we have to keep well informed.  
334 MP#1, Dominican Republic

**335 Theme 5: Providers View Themselves as Role Models**

336 Providers spoke of being role models for children in their care, despite the majority  
337 acknowledging that their own eating and physical activity health behaviors need to improve. As  
338 one provider stated:

339 “We know that it’s important that we set a good example for the children, and I try my  
340 best. We want to do the right thing for the children, even if you don’t do it for yourself.”  
341 FP#36, Ecuador

342 Another provider added:

343 “It’s important for the children to see us [adults] choosing healthy foods. Children want  
344 to copy what others do ... so if they see you eating fruits, they will want to eat fruits, but  
345 if they see you eating chips, that’s what they will want to eat.” FP#13, Colombia

346 Finally, some providers reported that improving their own personal eating and physical  
347 activity behaviors would make them better role models for children. As one provider mentioned:

## Latino Family Child Care Providers as Role Models

1  
2  
3 348 “Kids observe what we [adults] do, and they learn by seeing and copying what we  
4  
5 349 [adults] do. So, I do all I can to help and teach the children to eat healthy and be  
6  
7  
8 350 physically active, but I know that if I am not doing it, it does not set a good example for  
9  
10 351 them. I know that if they see me eating healthy and being active, they will want to eat  
11  
12  
13 352 healthy and be active ... they copy our [adults] habits.” FP#5, Guatemala

**DISCUSSION**

14  
15 353  
16  
17 354 Building on our prior research examining providers’ beliefs about healthy eating,  
18  
19  
20 355 physical activity and sedentary behaviors<sup>11</sup>, this study explored how Latino FCCH providers  
21  
22 356 view their ability to serve as role models for healthy eating and physical activity behaviors for  
23  
24 357 young children in their care. Mounting evidence suggests that child care providers influence the  
25  
26  
27 358 development of children’s health behaviors through modeling of behaviors.<sup>4,10,11,13,31,32</sup>  
28  
29 359 Nonetheless, to date, limited research has explored how FCCH providers view their ability to  
30  
31  
32 360 serve as role models for young children in these settings. For young children, caregivers are  
33  
34 361 important role models,<sup>10, 11,13,31,32</sup> as parents increasingly rely on child care settings for their  
35  
36 362 children at continually younger ages making child care providers influential in promoting healthy  
37  
38  
39 363 behaviors for children in their care. Therefore, it is critical to understand how providers’ view  
40  
41 364 their role and ability in promoting healthy behaviors, as health-related behaviors learned early in  
42  
43 365 life are likely to persist as children age.<sup>4,5,12</sup> To our knowledge, no studies have focused on  
44  
45  
46 366 Latino FCCH providers as role models. This information is needed given that FCCH providers  
47  
48 367 care for a large number of racial/ethnic minority children, including Latinos—a group at high  
49  
50 368 risk of childhood obesity.<sup>3-8</sup> The present study addresses this research gap in the current  
51  
52  
53 369 literature.

## Latino Family Child Care Providers as Role Models

370 Latino providers participating in this qualitative study viewed themselves as being  
371 knowledgeable about nutrition and physical activity, and being influential in helping children in  
372 their care develop and maintain healthy eating and physical activity habits. Moreover, study  
373 findings suggest that providers perceive that their own behaviors influence those of the children  
374 in their care. Nonetheless, the majority of providers reported that their own eating and physical  
375 activity behaviors needed to improve. These findings are consistent with a recent study  
376 conducted with a convenience sample of FCCH providers (n=166) in North Carolina that found  
377 that almost all providers (89.8%) were overweight or obese; approximately half did not meet  
378 guidelines for physical activity and fruit and vegetable intake.<sup>31</sup>

379 Findings of the current study suggest that Latino FCCH providers' ability to model  
380 healthy eating and physical activity behaviors for children in their care may be limited by their  
381 lack of self-efficacy to participate in these behaviors themselves and indicate that interventions  
382 should focus not only on providers' knowledge, but also on helping providers increase their self-  
383 efficacy for these behaviors. SCT posits that behaviors are influenced by many factors with one  
384 of them being observational learning and that people model behaviors of others.<sup>15,16,17</sup> Therefore,  
385 improving Latino providers' health behaviors would not only be beneficial for the providers'  
386 own health status, but would also be an important target in the promotion of children's healthy  
387 eating and physical activity behaviors.<sup>33-35</sup>

388 Most providers participating in this study reported lack of time and resources as being  
389 barriers to improving their own personal eating and physical activity behaviors. FCCH providers  
390 need time, resources, and support to improve their own eating and physical activity habits.  
391 Interventions and policies aimed at improving the eating and physical activity environments of  
392 FCCHs should target providers' personal behaviors and incorporate training resources and

## Latino Family Child Care Providers as Role Models

393 support that promote behavioral change of providers' own eating and physical activity and  
394 improve their weight status. Effective interventions will be those developed to take into account  
395 the busy lives of FCCH providers and the limited resource setting of FCCHs.

396 In conclusion, findings from the present study add to the scant literature examining child  
397 care providers' personal health behaviors and the potential influence of providers' modeling of  
398 health behaviors for children in their care.<sup>31,36,37</sup> Findings highlight the need for increased  
399 attention to FCCH providers' own health behaviors as a means of promoting providers' own  
400 health as well as health behaviors of young children in these settings. Future research should  
401 build on the qualitative findings of this study by quantifying Latino providers' self-efficacy to  
402 perform healthy eating and physical activity, and sedentary behaviors, as well as their self-  
403 efficacy to perform these behaviors. In addition, future quantitative studies are needed to  
404 determine how FCCH providers' health behaviors influence the behaviors and health outcomes  
405 of children in their care.

406 Study results should be considered in light of some limitations. Findings are based on a  
407 nonrandom, purposeful, and relatively small sample of low-income, Latino FCCH providers in  
408 four selected communities in MA. All of these factors limit the generalizability of the findings.  
409 There is possibility of selection bias as it may be that providers with a heightened interest in  
410 promoting health behaviors were more willing to take part in the study. Furthermore, providers  
411 aware of the importance of health behaviors may have been inclined to give socially desirable  
412 responses. In addition, we do not have data on providers who did not join the study, and  
413 therefore, we are unable to assess the extent to which the providers in our sample represented the  
414 broader group of Latino FCCH providers. Thus, further research is needed to establish  
415 generalizability of the findings of this current study and to explore if they are applicable to other

## Latino Family Child Care Providers as Role Models

1  
2  
3 416 ethnic groups of FCCH providers in other parts of the country. Providers participating in this  
4  
5 417 study focused on physical activity and did not discuss sedentary behaviors as much. This may  
6  
7 418 have been due to the construction of the FGD guide, but could also indicate the need for further  
8  
9 419 education on the distinction between physical activity and sedentary behaviors. Finally, despite  
10  
11 420 the use of a rigorous process of backward-forward translation to ensure that the integrity and  
12  
13 421 equivalence of the data were not lost in the process, it is possible that some loss of meaning  
14  
15 422 might have occurred. Future research can address these limitations by exploring influences on  
16  
17 423 Latino providers' beliefs, attitudes, and practices from other communities across the United  
18  
19 424 States, selecting a larger sample size and using multiple methods of data collection including  
20  
21 425 direct observations.  
22  
23  
24  
25

26  
27 **CONCLUSION**

28  
29 427 Given evidence of the important role FCCH providers play in promoting healthy eating  
30  
31 428 and physical activity of young children in their care and evidence from the general literature of  
32  
33 429 the importance of a caregiver's role modeling in influencing children's behaviors, health  
34  
35 430 promotion interventions targeting FCCH settings should consider health promotion activities to  
36  
37 431 increase FCCH providers' self-efficacy and to improve their personal eating and physical activity  
38  
39 432 behaviors. It is likely that these efforts would not only result in improvements of FCCH  
40  
41 433 providers own healthy eating and physical activity behaviors, but also have the potential to  
42  
43 434 further promote healthy eating and physical activity behaviors and positive health outcomes of  
44  
45 435 children attending FCCHs.  
46  
47  
48  
49

50  
51 **Abbreviations**  
52  
53  
54  
55  
56  
57  
58  
59  
60



## Latino Family Child Care Providers as Role Models

437 ECE: Early Care and Education; FCCHs: Family Child Care Homes; SCT: Social Cognitive  
 438 Theory; MA: Massachusetts; GED: General Educational Diploma; FGD: Focus Group  
 439 Discussion; FP: Female Provider; PM: Male Provider.

## REFERENCES

1. The Hispanic population: Available online:  
<https://www.census.gov/prod/cen2010/briefs/c2010br-04.pdf> (accessed on July 29 2017).
2. Flegal, K.M.; Kruszon-Moran, D.; Carroll, M.D.; Fryar, C.D.; Ogden, C.L. Trends in obesity among adults in the United States, 2005 to 2014. *JAMA* 2016, *315*, 2284–2291. doi:10.1001/jama.2016.6458.
3. Ogden, C. L., Carroll, M. D., & Flegal, K. M. Prevalence of obesity in the United States. *JAMA* 2014; *312*(2), 189-190. doi:10.1001/jama.2014.6228
4. Larson, N., Ward, D. S., Neelon, S. B., & Story, M. What role can child-care settings play in obesity prevention? A review of the evidence and call for research efforts. *Journal of the American Dietetic Association* 2011; *111*: 1343-1362.
5. Sisson, S.B., Krampe, M. Anundson, K., & Castle, S. (2016). Obesity prevention and obesogenic behavior interventions in child care: A systematic review. *Preventive Medicine* 2016; *87*:57-69. doi:10.1016/j.ypmed.2016.02.016
6. Child Care Aware of America. *Child care in America: 2016 state fact sheets*. 2016; Retrieved from <http://usa.childcareaware.org/advocacy-public-policy/resources/reports-and-research/statefactsheets/>
7. Centers for Disease Control and Prevention (CDC). Early child care and education (ECE). Atlanta, GA: Author.
8. Laughlin, L. *Who's minding the kids? Child care arrangements: Spring 2011* (Report No. P70-135, U.S. Department of Commerce, U.S. Census Bureau). 2013; Retrieved from <http://www.census.gov/content/dam/Census/library/publications/2013/demo/p70-135.pdf>
9. Daugherty, L. *Child care choices of Hispanic families: Why aren't families using child care?* (Doctoral dissertation). 2010; Retrieved from [http://www.rand.org/pubs/rgs\\_dissertations/RGSD258.html](http://www.rand.org/pubs/rgs_dissertations/RGSD258.html)
10. Lindsay, A. C., Greaney, M. L., Wallington, S. F., Sands, F. D., Wright, J. A., & Salkeld, J. Latino parents' perceptions of the eating and physical activity experiences of their pre-school children at home and at family child-care homes. *Public Health Nutrition* 2017; *20*(2): 346-356. doi:10.1017/S136898001600207X
11. Lindsay, A. C., Salkeld, J. A., Greaney, M. L., & Sands, F. D. Latino family child care providers' beliefs, attitudes and practices related to promotion of healthy behaviors among preschool children: A qualitative study. *Journal of Obesity* 2015; doi:10.1155/2015/409742.
12. Story, M., Kaphingst, K. M., & French, S. The role of child care settings in obesity prevention. *Future Child* 2006; *16*(1): 143-168.
13. Erinosh, T. O., Hales, D. P., McWilliams, C. P., Emunah, J., & Ward, D. S. Nutrition policies at child-care centers and impact on role modeling of healthy eating behaviors of caregivers. *Journal of the Academy of Nutrition and Dietetics* 2012; *112*(1): 119-124. doi:10.1016/j.jada.2011.08.04

## Latino Family Child Care Providers as Role Models

- 1  
2  
3 480 14. Ward, S., Bélanger, M., Donovan, D., & Carrier, N. Systematic review of the relationship  
4 481 between childcare educators' practices and preschoolers' physical  
5 482 activity and eating behaviours. *Obesity Review* 2015; 16(12): 1055-1070.  
6 483 doi:10.1111/obr.12315
- 7  
8 484 15. Bandura, A. Social cognitive theory: An agentic perspective. *Annual Review of Psychology*  
9 485 2001; 52: 1-26. doi:10.1146/annurev.psych.52.1.1
- 10 486 16. Bandura, A. (2004). Health promotion by social cognitive means. *Health Education & Behavior*  
11 487 2004; 31:143-164. doi:10.1177/1090198104263660
- 12 488 17. Bandura, A. Toward a psychology of human agency. *Perspectives on Psychological Science*  
13 489 2006; 1: 164-180. doi:10.1111/j.1745-6916.2006.00011.x
- 14 490 18. Mann, C. M., Ward, D. S., Vaughn, A., Benjamin Neelon, S. E., Long Vidal, L. J., Omar,  
15 491 S.,... Østbye, T. Application of the intervention mapping protocol to develop Keys, a  
16 492 family child care home intervention to prevent early childhood obesity. *BMC Public*  
17 493 *Health* 2015; 10(15): 1227. doi:10.1186/s12889-015-2573-9
- 18 494 19. Fees, B., Trost, S., Bopp, M., & Dzewaltowski, D. A. Physical activity programming in  
19 495 family child care homes: Providers' perceptions of practices and barriers. *Journal of*  
20 496 *Nutrition Education and Behavior* 2009; 41(4): 268-273. doi:10.1016/j.jneb.2008.01.013
- 21 497 20. Lawrence, S., Schwarte, L., Samuels, S., & McCarthy, W. J. Health care providers'  
22 498 perceived role in changing environments to promote healthy eating and physical activity:  
23 499 Baseline findings from health care providers participating in the healthy eating, active  
24 500 communities program. *Pediatrics* 2009; 123(Suppl 5): S293-300. doi:10.1542/peds.2008-  
25 501 2780H
- 26 502 21. Østbye, T., Mann, C. M., Vaughn, A. E., Namenek Brouwer, R. J., Benjamin Neelon, S.  
27 503 E., Hales, D.,... Ward, D. S. The keys to healthy family child care homes intervention:  
28 504 Study design and rationale. *Contemporary Clinical Trials* 2015; 40: 81-89.  
29 505 doi:10.1016/j.cct.2014.11.003
- 30 506 22. Tovar, A., Risica, P., Mena, N., Lawson, E., Ankoma, A., & Gans, K. M. An assessment of  
31 507 nutrition practices and attitudes in family child-care homes: Implications for policy  
32 508 implementation. *Preventing Chronic Disease* 2015; 4(12): E88.  
33 509 doi:10.5888/pcd12.140587
- 34 510 23. Trost, S. G., Messner, L., Fitzgerald, K., & Roths, B. A nutrition and physical  
35 511 activity intervention for family child care homes. *American Journal of Preventive*  
36 512 *Medicine* 2011; 41(4): 392-398. doi:10.1016/j.amepre.2011.06.030
- 37 513 24. de Silva-Sanigorski, A., Elea, D., Bell, C., Kremer, P., Carpenter, L., Nichols,  
38 514 M.,... Swinburn, B. Obesity prevention in the family day care setting: Impact of the  
39 515 Romp & Chomp intervention on opportunities for children's physical activity and  
40 516 healthy eating. *Child Care Health and Development* 2011; 37(3): 385-393.  
41 517 doi:10.1111/j.1365-2214.2010.01205.x
- 42 518 25. Tucker, P., Vanderloo, L. M., Burke, S. M., Irwin, J. D., & Johnson, A. M. Prevalence and  
43 519 influences of preschoolers' sedentary behaviors in early learning centers: A cross-  
44 520 sectional study. *BMC Pediatrics* 2015; 18(15): 128. doi:10.1186/s12887-015-0441-5
- 45 521 26. Culley, L., Hudson, N., & Rapport, F. Using focus groups with minority ethnic communities:  
46 522 Researching infertility in British South Asian communities. *Qualitative Health Research*  
47 523 2007; 17(1): 102-112.
- 48 524 27. Kidd, P. S., & Parshall, M. B. Getting the focus and the group: Enhancing analytical rigor in  
49 525 focus group research. *Qualitative Health Research* 2000; 10(3): 293-308.

## Latino Family Child Care Providers as Role Models

- 1  
2  
3 526 28. Vaismoradi, M., H. Turunen, and T. Bondas. Content analysis and thematic analysis:  
4 527 Implications for conducting a qualitative descriptive study. *Nurs Health Sci.* 2013;  
5 528 15(3):398-405. doi:10.1111/nhs.12048.
- 7 529 29. Silverman, D. *Interpreting Qualitative Data: Methods for Analysing Talk, Text and*  
8 530 *Interaction* (3rd ed.). London: Sage. 2006.
- 9 531 30. Ritchie J, Spencer L, O'Connor W. Carrying out qualitative analysis. In Ritchie J, Lewis J  
10 532 (eds) *Qualitative research practice.* 2004; 219–262. London: Sage Publications.
- 11 533 31. Tovar, A., Vaughn, A. E., Grummon, A., Burney, R., Erinosh, T., Østbye, T., & Ward, D. S.  
12 534 (2016). Family child care home providers as role models for children: Cause for concern?  
13 535 *Preventive Medicine Reports* 2016; 14(5): 308-313. doi:10.1016/j.pmedr.2016.11.01.
- 15 536 32. Tovar A, Mena NZ, Risica P, Gorham G, Gans KM. Nutrition and Physical Activity  
16 537 Environments of Home-Based Child Care: What Hispanic Providers Have to Say.  
17 538 *Child Obes.* 2015; 11(5):521-9. doi: 10.1089/chi.2015.0040.
- 19 539 33. Brown, R., & Ogden, J. Children's eating attitudes and behavior: A study of the modeling  
20 540 and control theories of parental influence. *Health Education Research* 2004; 19(3), 261-  
21 541 271.
- 22 542 34. Hendy, H. M., & Raudenbush, B. Effectiveness of teacher modeling to encourage food  
23 543 acceptance in preschool children. *Appetite* 2000; 34(1): 61-76.  
24 544 doi:10.1006/appe.1999.0286
- 26 545 35. Nicklas, T. A., Baranowski, T., Baranowski, J. C., Cullen, K., Rittenberry, L., & Olvera, N.  
27 546 (2001). Family and child-care provider influences on preschool children's fruit, juice, and  
28 547 vegetable consumption. *Nutrition Reviews* 2001; 59(7), 224-235. doi:10.1111/j.1753-  
29 548 4887.2001.tb07014.x
- 31 549 36. Baldwin D., Gaines S., Wold J.L., Williams A., Leary J. The health of female child care  
32 550 providers: implications for quality of care. *J. Community Health Nurs.* 2007;24:1–17.
- 33 551 37. Bromer J. Helpers, mothers, and preachers: the multiple roles and discourses of family child  
34 552 care providers in an African-American community. *Early Child Res. Q.* 2001;16:313–  
35 553 327.
- 36  
37  
38  
39  
40  
41  
42  
43  
44  
45  
46  
47  
48  
49  
50  
51  
52  
53  
54  
55  
56  
57  
58  
59  
60

## Latino Family Child Care Providers as Role Models

**Table 1. Socio-demographic and acculturation characteristics of focus group participants (n = 44).**

| Age                                        | Mean $\pm$ SD | N (%)     |
|--------------------------------------------|---------------|-----------|
|                                            | 41 $\pm$ 9.3  |           |
| <b>Race</b>                                |               |           |
| Hispanic or Latino                         |               | 44 (100)  |
| <b>Sex</b>                                 |               |           |
| Female                                     |               | 41 (93.2) |
| Male                                       |               | 3 (6.8)   |
| <b>Foreign-born</b>                        |               |           |
| Yes                                        |               | 42 (95.5) |
| No                                         |               | 2 (4.5)   |
| <b>Country of origin</b>                   |               |           |
| Colombia                                   |               | 12 (27.3) |
| Dominican Republic                         |               | 9 (20.5)  |
| Guatemala                                  |               | 5 (11.4)  |
| Puerto Rico                                |               | 4 (9.2)   |
| Peru                                       |               | 3 (6.8)   |
| United States                              |               | 2 (4.5)   |
| Mexico                                     |               | 2 (4.5)   |
| El Salvador                                |               | 2 (4.5)   |
| Honduras                                   |               | 2 (4.5)   |
| Ecuador                                    |               | 2 (4.5)   |
| Cuba                                       |               | 1 (2.3)   |
| <b>Years in the United States</b>          |               |           |
|                                            | Mean $\pm$ SD |           |
|                                            | 22 $\pm$ 3.4  |           |
| <b>Predominant language spoken at home</b> |               |           |
| Spanish                                    |               | 44 (100)  |
| <b>Marin scale acculturation score</b>     |               |           |
|                                            | Mean $\pm$ SD |           |
|                                            | 2.2 $\pm$ 0.9 |           |
| <b>Education</b>                           |               |           |
| GED*                                       |               | 4 (9.2)   |
| High school graduate                       |               | 10 (22.7) |
| Associate                                  |               | 17 (38.5) |
| Bachelor                                   |               | 12 (27.3) |
| Missing                                    |               | 1 (2.3)   |
| <b>Annual household income</b>             |               |           |
| Under \$25,000                             |               | 10 (22.7) |
| \$25,000–\$50,000                          |               | 26 (59.1) |
| More than \$50,000                         |               | 8 (18.2)  |
| <b>Marital status</b>                      |               |           |
| Single                                     |               | 2 (4.5)   |
| Married                                    |               | 28 (63.3) |
| Separated                                  |               | 4 (9.2)   |
| Divorced                                   |               | 8 (18.2)  |
| Widowed                                    |               | 2 (4.5)   |

\* GED: General Educational Diploma

## COREQ (CONsolidated criteria for REporting Qualitative research) Checklist

A checklist of items that should be included in reports of qualitative research. You must report the page number in your manuscript where you consider each of the items listed in this checklist. If you have not included this information, either revise your manuscript accordingly before submitting or note N/A.

| Topic                                          | Item No. | Guide Questions/Description                                                                                                                              | Reported on Page No. |
|------------------------------------------------|----------|----------------------------------------------------------------------------------------------------------------------------------------------------------|----------------------|
| <b>Domain 1: Research team and reflexivity</b> |          |                                                                                                                                                          |                      |
| <i>Personal characteristics</i>                |          |                                                                                                                                                          |                      |
| Interviewer/facilitator                        | 1        | Which author/s conducted the interview or focus group?                                                                                                   | 2,9                  |
| Credentials                                    | 2        | What were the researcher's credentials? E.g. PhD, MD                                                                                                     | 1                    |
| Occupation                                     | 3        | What was their occupation at the time of the study?                                                                                                      | 1                    |
| Gender                                         | 4        | Was the researcher male or female?                                                                                                                       | 2,9                  |
| Experience and training                        | 5        | What experience or training did the researcher have?                                                                                                     | 9                    |
| <i>Relationship with participants</i>          |          |                                                                                                                                                          |                      |
| Relationship established                       | 6        | Was a relationship established prior to study commencement?                                                                                              | 8                    |
| Participant knowledge of the interviewer       | 7        | What did the participants know about the researcher? e.g. personal goals, reasons for doing the research                                                 | 8                    |
| Interviewer characteristics                    | 8        | What characteristics were reported about the interviewer/facilitator? e.g. Bias, assumptions, reasons and interests in the research topic                | 9                    |
| <b>Domain 2: Study design</b>                  |          |                                                                                                                                                          |                      |
| <i>Theoretical framework</i>                   |          |                                                                                                                                                          |                      |
| Methodological orientation and Theory          | 9        | What methodological orientation was stated to underpin the study? e.g. grounded theory, discourse analysis, ethnography, phenomenology, content analysis | 8                    |
| <i>Participant selection</i>                   |          |                                                                                                                                                          |                      |
| Sampling                                       | 10       | How were participants selected? e.g. purposive, convenience, consecutive, snowball                                                                       | 8                    |
| Method of approach                             | 11       | How were participants approached? e.g. face-to-face, telephone, mail, email                                                                              | 8                    |
| Sample size                                    | 12       | How many participants were in the study?                                                                                                                 | 10                   |
| Non-participation                              | 13       | How many people refused to participate or dropped out? Reasons?                                                                                          | 8,10                 |
| <i>Setting</i>                                 |          |                                                                                                                                                          |                      |
| Setting of data collection                     | 14       | Where was the data collected? e.g. home, clinic, workplace                                                                                               | 8                    |
| Presence of non-participants                   | 15       | Was anyone else present besides the participants and researchers?                                                                                        | 9                    |
| Description of sample                          | 16       | What are the important characteristics of the sample? e.g. demographic data, date                                                                        | Table 1              |
| <i>Data collection</i>                         |          |                                                                                                                                                          |                      |
| Interview guide                                | 17       | Were questions, prompts, guides provided by the authors? Was it pilot tested?                                                                            | 9                    |
| Repeat interviews                              | 18       | Were repeat interviews carried out? If yes, how many?                                                                                                    | 10                   |
| Audio/visual recording                         | 19       | Did the research use audio or visual recording to collect the data?                                                                                      | 9                    |
| Field notes                                    | 20       | Were field notes made during and/or after the interview or focus group?                                                                                  | 9                    |
| Duration                                       | 21       | What was the duration of the interviews or focus group?                                                                                                  | 9                    |
| Data saturation                                | 22       | Was data saturation discussed?                                                                                                                           | 10                   |
| Transcripts returned                           | 23       | Were transcripts returned to participants for comment and/or                                                                                             | N/A                  |

| Topic                                  | Item No. | Guide Questions/Description                                                                                                        | Reported on Page No. |
|----------------------------------------|----------|------------------------------------------------------------------------------------------------------------------------------------|----------------------|
|                                        |          | correction?                                                                                                                        |                      |
| <b>Domain 3: analysis and findings</b> |          |                                                                                                                                    |                      |
| <i>Data analysis</i>                   |          |                                                                                                                                    |                      |
| Number of data coders                  | 24       | How many data coders coded the data?                                                                                               | 10                   |
| Description of the coding tree         | 25       | Did authors provide a description of the coding tree?                                                                              | N/A, 10              |
| Derivation of themes                   | 26       | Were themes identified in advance or derived from the data?                                                                        | 10                   |
| Software                               | 27       | What software, if applicable, was used to manage the data?                                                                         | N/A                  |
| Participant checking                   | 28       | Did participants provide feedback on the findings?                                                                                 | N/A                  |
| <i>Reporting</i>                       |          |                                                                                                                                    |                      |
| Quotations presented                   | 29       | Were participant quotations presented to illustrate the themes/findings?<br>Was each quotation identified? e.g. participant number | 11-16                |
| Data and findings consistent           | 30       | Was there consistency between the data presented and the findings?                                                                 | 11-18                |
| Clarity of major themes                | 31       | Were major themes clearly presented in the findings?                                                                               | 11-16                |
| Clarity of minor themes                | 32       | Is there a description of diverse cases or discussion of minor themes?                                                             | 11-16                |

Developed from: Tong A, Sainsbury P, Craig J. Consolidated criteria for reporting qualitative research (COREQ): a 32-item checklist for interviews and focus groups. *International Journal for Quality in Health Care*. 2007. Volume 19, Number 6: pp. 349 – 357

Once you have completed this checklist, please save a copy and upload it as part of your submission. DO NOT include this checklist as part of the main manuscript document. It must be uploaded as a separate file.

# BMJ Open

## Easier Said Than Done: A Qualitative Study Conducted in the U.S. Exploring Latino Family Child Care Home Providers as Role Models for Healthy Eating and Physical Activity Behaviors

|                                 |                                                                                                                                                                                                                                                                                                                                                 |
|---------------------------------|-------------------------------------------------------------------------------------------------------------------------------------------------------------------------------------------------------------------------------------------------------------------------------------------------------------------------------------------------|
| Journal:                        | <i>BMJ Open</i>                                                                                                                                                                                                                                                                                                                                 |
| Manuscript ID                   | bmjopen-2017-018219.R2                                                                                                                                                                                                                                                                                                                          |
| Article Type:                   | Research                                                                                                                                                                                                                                                                                                                                        |
| Date Submitted by the Author:   | 20-Sep-2017                                                                                                                                                                                                                                                                                                                                     |
| Complete List of Authors:       | Lindsay, AC; University of Massachusetts Boston, Department of Exercise and Health Sciences; Department of Nutrition<br>Greaney, Mary ; University of Rhode Island, Wallington, Sherrie; Georgetown University, Oncology; Georgetown University, Oncology<br>Wright, Julie A.; University of Massachusetts Boston, Exercise and Health Sciences |
| <b>Primary Subject Heading</b>: | Qualitative research                                                                                                                                                                                                                                                                                                                            |
| Secondary Subject Heading:      | Qualitative research, Public health                                                                                                                                                                                                                                                                                                             |
| Keywords:                       | Latino, role modeling, eating, physical activity, family child care home, preschoolers                                                                                                                                                                                                                                                          |
|                                 |                                                                                                                                                                                                                                                                                                                                                 |

SCHOLARONE™  
Manuscripts

Only

Latino Family Child Care Providers as Role Models

**Running head:** Latino Family Child Care Providers as Role Models

**Easier Said Than Done: A Qualitative Study Conducted in the U.S. Exploring Latino Family Child Care Home Providers as Role Models for Healthy Eating and Physical Activity Behaviors**

Ana Cristina Lindsay<sup>1,2</sup>, Mary L. Greaney<sup>3</sup>, Sherrie F. Wallington<sup>4</sup>, Julie A. Wright<sup>1</sup>

<sup>1</sup> University of Massachusetts Boston, Exercise and Health Sciences Department, College of Nursing and Health Sciences, Boston, MA, USA.

<sup>2</sup> Harvard T.H. Chan School of Public Health, Department of Nutrition, Boston, MA, USA.

<sup>3</sup> University of Rhode Island, Health Studies & Department of Kinesiology, Kingston, RI, USA

<sup>4</sup> Lombardi Comprehensive Cancer Center, Georgetown University Medical Center, Washington, DC, USA

**Authors' Email Address:**

Ana Cristina Lindsay: Ana.Lindsay@umb.edu

Mary L. Greaney: mgreaney@uri.edu

Sherrie F. Wallington: slw49@georgetown.edu

Julie A. Wright: Julie.Wright@umb.edu

**Address for Correspondence (Permanent address):**

Ana Cristina Lindsay, DDS, MPH, DPH

Associate Professor, Exercise and Health Sciences Department

University of Massachusetts Boston

100 Morrissey Boulevard, Boston, MA 02125

Phone: 617-287-7579

Email: Ana.Lindsay@umb.edu

**Abstract word count:** 312 words

**Main text word count:** 3,883 words

**Tables and figures:** 0

**Number of references:** 31



Latino Family Child Care Providers as Role Models

1  
2  
3  
4  
5  
6  
7  
8  
9  
10  
11  
12  
13  
14  
15  
16  
17  
18  
19  
20  
21  
22  
23  
24  
25  
26  
27  
28  
29  
30  
31  
32  
33  
34  
35  
36  
37  
38  
39  
40  
41  
42  
43  
44  
45  
46  
47  
48  
49  
50  
51  
52  
53  
54  
55  
56  
57  
58  
59  
60

## 40 Disclosure Statements

41  
42 **Acknowledgments:** The authors are grateful for the assistance of personnel at Massachusetts  
43 Department of Early Education and Care, Child Care Circuit, Family Care Systems, and CACFP,  
44 especially “Yours for Children, Inc.” The authors are thankful to the providers and parents who  
45 participated in this study and to Ms. Amina Hetu for her collaboration in conducting the focus  
46 groups.

47  
48 **Financial Support:** This study was supported by a grant from Aetna Foundation Inc. (Grant no.  
49 11-02395), for which Ana Lindsay, DDS, MPH, DPH, is Principal Investigator.

50  
51 **Conflict of Interest:** The authors declare no conflict of interests regarding the publication of this  
52 paper.

53  
54 **Authorship:** ACL participated in study design, data collection, data analysis, and manuscript  
55 preparation and review. MLG participated in study design, manuscript preparation, and  
56 manuscript review. SFW developed the theoretical framework for the study, participated in  
57 manuscript preparation and review. JAW participated in manuscript preparation and manuscript  
58 review.

59  
60 **Ethical Standards Disclosure:** This study was approved by the Institutional Review Board for  
61 the Protection of Human Subjects at the Harvard T.H. Chan School of Public Health. Written and  
62 oral informed consent was obtained from all participants.

63  
64 **Data Sharing:** Data and all other materials for this study are kept at the Department of Exercise  
65 and Health Sciences, University of Massachusetts Boston. The datasets generated during and/or  
66 analyzed during the current study are not publicly available due the terms of consent to which  
67 participants agreed to, but are available from the corresponding author on reasonable request.

## Latino Family Child Care Providers as Role Models

68 **ABSTRACT**

69 **Objective:** Latinos are the largest and most rapidly growing minority population group in the  
70 United States and are disproportionately affected by obesity and related chronic diseases. Child  
71 care providers likely influence the eating and physical activity behaviors of children in their care  
72 and, therefore, are important targets for interventions designed to prevent childhood obesity.  
73 Nonetheless, there is a paucity of research examining the behaviors of Family Child Care Home  
74 (FCCH) providers and whether they model healthy eating and physical activity behaviors.  
75 Therefore, this study explored Latino FCCH providers' beliefs and practices related to healthy  
76 eating, physical activity and sedentary behaviors, and how they view their ability to serve as role  
77 models for these behaviors for young children in their care.

78 **Methods:** Qualitative study consisting of six focus groups conducted in Spanish with a sample  
79 of 44 state-licensed Latino FCCH providers in the state of Massachusetts. Translated transcripts  
80 were analyzed using thematic analyses to identify meaningful patterns.

81 **Results:** Analyses revealed that Latino FCCH providers have positive beliefs and attitudes about  
82 the importance of healthy eating and physical activity for children in their care, but personally  
83 struggle with these same behaviors and with maintaining a healthy weight status. The ability of  
84 Latino FCCH providers to model healthy eating and physical activity may be limited by their  
85 low self-efficacy in their ability to be physically active, eat a healthy diet, and maintain a healthy  
86 weight.

87 **Conclusions:** Interventions designed to improve healthy eating and physical activity behaviors  
88 of children enrolled in FCCHs should address providers' own health behaviors as well as their  
89 modeling of these health behaviors. Future research can build on the findings of this qualitative  
90 study by quantifying Latino FCCH providers' eating and physical activity behaviors, and

## Latino Family Child Care Providers as Role Models

1  
2  
3 91 determining how these behaviors influence behaviors and health outcomes of children in their  
4  
5 92 care.

6  
7  
8 93 **Keywords:** Latino; role modeling; eating; physical activity; family child care homes;  
9  
10 94 preschoolers.

95 **Strengths and limitations of this study:**

- 14  
15 96 • To our knowledge, this is the first study to examine Latino FCCH providers' view of  
16  
17 97 their ability to serve as role models for healthy eating and physical activity behaviors of  
18  
19 98 children in these settings.
- 20  
21  
22 99 • Study findings highlight the need for increased attention to FCCH providers' health  
23  
24 100 behaviors as a means of promoting providers' own health, as well as healthy eating and  
25  
26 101 physical activity among young children in their care.
- 27  
28  
29 102 • Interventions aimed at improving eating and physical activity behaviors of children  
30  
31 103 attending FCCHs should consider health promotion activities to increase FCCH  
32  
33 104 providers' self-efficacy for physical activity and healthy eating, and supports to help  
34  
35 105 providers improve their eating and physical activity behaviors.
- 36  
37  
38 106 • Study limitations include the use of a non-random, purposeful, and relatively small  
39  
40 107 sample of low-income, Latino FCCH providers in four selected communities in MA,  
41  
42 108 U.S., which limits the generalizability of the findings.  
43  
44  
45  
46  
47  
48  
49  
50  
51  
52  
53  
54  
55  
56  
57  
58  
59  
60

Latino Family Child Care Providers as Role Models

109 **INTRODUCTION**

110 Latinos are the largest and most rapidly growing minority population group in the United  
111 States (U.S.)<sup>1</sup> and are disproportionately affected by obesity and related chronic diseases.<sup>2,3</sup>  
112 Children in low-income Latino families are at elevated risk of becoming overweight and obese,  
113 making childhood obesity among Latinos a pressing public health concern because childhood  
114 weight status tracks into adulthood.<sup>3</sup> Substantive efforts are needed to prevent and control  
115 obesity among Latino children if future trends in chronic diseases in this population are to be  
116 altered.

117 Early care and education (ECE) settings are important social environments that influence  
118 the eating and physical activity behaviors of children attending these institutions.<sup>4,5</sup> Increasing  
119 ECE attendance rates and time spent in these settings make ECEs important venues for health  
120 promotion and obesity prevention efforts targeting young children.<sup>6</sup> Family Child Care Homes  
121 (FCCHs) are a type of ECE setting where providers care for children other than their own in their  
122 own home.<sup>6,7</sup> More than 1.9 million preschool children attend FCCHs, and this ECE setting is the  
123 second largest provider of non-relative care for children up to 5 years old in the U.S.<sup>8</sup>

124 Latino families may prefer FCCHs to other ECE settings due to cultural preferences for  
125 family-like care, flexible hours, and lower costs, thus making FCCHs an ideal setting for obesity  
126 prevention efforts designed for Latino families and children.<sup>9</sup> Latino parents who enroll their  
127 children in an FCCH believe that these settings are instrumental in shaping and reinforcing their  
128 children's healthy eating and physical activity habits.<sup>10,11</sup> In fact, recent research suggests that  
129 FCCH providers may be more influential than, or equally as important as parents in shaping food  
130 preferences of young children.<sup>5,12</sup> FCCH providers, like parents, help establish and reinforce  
131 early healthy eating and physical activity behaviors among young children by developing an

## Latino Family Child Care Providers as Role Models

1  
2  
3 132 environment that fosters healthy behaviors.<sup>12,13</sup> FCCH providers influence the behavior of  
4  
5 133 children in their care in many ways (e.g., knowledge of nutrition and physical activity, selection  
6  
7  
8 134 of daily activities, food selection, meal structure, etc.).<sup>12,13</sup>  
9

10  
11 135 Research suggests that children model the behaviors of others and that this modeling  
12  
13 136 helps young children develop lifelong habits that contribute to healthy weight or to overweight  
14  
15 137 and obesity.<sup>14</sup> Social cognitive theory (SCT) posits that behavior acquisition is directly related to  
16  
17 138 observing others within the context of social interactions and experiences.<sup>15,16,17</sup> Many types of  
18  
19 139 behaviors, including eating and physical activity, can be learned through observing influential  
20  
21 140 others such as caregivers and peers. For children attending FCCHs, the FCCH provider may be a  
22  
23 141 particularly influential role model for healthy behaviors.<sup>18</sup>  
24  
25

26  
27 142 Much of the obesity prevention research in FCCH settings has focused on improving the  
28  
29 143 eating and physical activity environments of these settings and changing providers' feeding and  
30  
31 144 physical activity practices.<sup>11,19-23</sup> For example, providers' beliefs, attitudes, and practices related  
32  
33 145 to health behaviors have been examined to identify potential targets for intervention.<sup>19,22-26</sup>  
34  
35 146 However, there is a paucity of research examining FCCH providers' personal eating and physical  
36  
37 147 activity behaviors, and how their behaviors may influence the behaviors of children in their care.  
38  
39 148 Therefore, this qualitative study explored: 1) Latino FCCH providers' beliefs and practices  
40  
41 149 related to healthy eating, physical activity and sedentary behaviors, and 2) how Latino FCCH  
42  
43 150 providers view their ability to serve as role models for young children in their care.  
44  
45  
46  
47

**151 METHODS****152 Study Design, Setting, and Sample**

153  
154 This study was part of a larger multi-component exploratory qualitative research project  
guided by the socio-ecological model designed to systematically explore multi-level factors

## Latino Family Child Care Providers as Role Models

1  
2  
3 155 influencing eating, physical activity, and sedentary behaviors among Latino preschool-age  
4  
5 156 children aged 2-5 attending FCCHs in Massachusetts (MA).<sup>10,11</sup> Recognizing the value of  
6  
7  
8 157 qualitative methodology in formative research, a focus group design with a phenomenological  
9  
10 158 approach was used to collect and analyze data with the purpose of understanding providers'  
11  
12 159 perceptions, perspectives and understandings of their ability to serve as role models for health  
13  
14 160 behaviors (e.g., physical activity and healthy eating) of children in their care (phenomenon).  
15  
16 161 Focus group discussions (FGD) were conducted because they are an important technique for  
17  
18 162 conducting research in diverse cultural settings and provide valuable information.<sup>27</sup> Moreover,  
19  
20 163 the synergistic effects of the group setting elicit ideas and discussions that may not arise in  
21  
22 164 individual interviews.<sup>28</sup>

26  
27 165 As noted in our prior research, FCCH regulators were identified and contacted by  
28  
29 166 research staff to help develop a list of licensed FCCH from four areas in MA (North Shore,  
30  
31 167 Greater Boston, Central, and Western).<sup>10,11</sup> This list was used to randomly select 22 licensed  
32  
33 168 from each of the four areas of MA (total 88 FCCH providers). Each selected provider was mailed  
34  
35 169 a flyer in Spanish outlining the study that included a phone number to call for additional  
36  
37 170 information. Interested providers were screened for eligibility (e.g., self-identified as Latino,  
38  
39 171 having at least three children aged 2–5 in the FCCH). A reminder phone call was made one to  
40  
41 172 two days before the scheduled FGD.

**173 Data Collection**

47  
48 174 A native Spanish speaker trained in qualitative research methods moderated all FGDs in  
49  
50 175 Spanish with assistance from the first author, using a piloted discussion guide with open-ended  
51  
52 176 questions and probes. The pilot-tested guide explored FCCH providers': (1) beliefs and attitudes  
53  
54 177 related to eating and physical activity, (2) barriers to having and/or maintaining healthy eating  
55  
56  
57  
58  
59  
60

## Latino Family Child Care Providers as Role Models

1  
2  
3 178 and physical activity habits; (3) perceptions of their influence on the eating, physical activity and  
4  
5 179 sedentary behaviors of children in their care; and (4) perceptions of their ability to serve as role  
6  
7  
8 180 models of healthy eating and physical activity behaviors for young children in their care. This  
9  
10  
11 181 guide was used for all FGDs.

12  
13 182 All FGDs were held in meeting rooms at public libraries between April and September  
14  
15 183 2015, and lasted approximately 90 minutes. Before each FGD, the moderator explained the  
16  
17 184 procedures and answered participants' questions and obtained informed consent. All FGDs were  
18  
19  
20 185 audiotaped after participants provided written informed consent. Following the FGD, participants  
21  
22 186 completed a brief, self-administered questionnaire assessing education, marital status, country of  
23  
24 187 origin, and length of time living in the U.S. A bilingual (Spanish and English) qualitative  
25  
26  
27 188 researcher served as an assistant moderator (ACL) and took notes during each session. The  
28  
29 189 moderator and assistant moderator convened for 15 minutes at the end of each FGD in a private  
30  
31  
32 190 room and discussed new or recurring themes heard during the session, which were entered into a  
33  
34 191 grid of major themes and subthemes. This grid system was used to closely follow the emergence  
35  
36 192 of new themes and subthemes and to determine when data saturation was achieved.

37  
38  
39 193 Participants received a \$25 gift card for their participation. This study was approved by  
40  
41 194 the Institutional Review Board for the Protection of Human Subjects of the Harvard T.H. Chan  
42  
43 195 School of Public Health.

**Data Analysis**

44  
45  
46 196  
47  
48 197 Audiotapes were transcribed verbatim in Spanish and translated into English without  
49  
50 198 identifiers by a bilingual and native Spanish speaker using forward-backward techniques to  
51  
52  
53 199 establish semantic equivalence in translation. This process ensured that the integrity and  
54  
55 200 equivalence of the data were not lost in the process of translation.  
56  
57  
58  
59  
60

## Latino Family Child Care Providers as Role Models

1  
2  
3 201 Transcripts were analyzed using thematic analyses, an iterative process of coding data in  
4  
5 202 phases to identify meaningful patterns.<sup>28</sup> Analytic phases included data familiarization,  
6  
7 203 generation of initial codes, identifying patterns and themes, and defining and naming themes.<sup>29,30</sup>  
8  
9 204 Two authors, experienced qualitative researchers (ACL, MLG), independently coded all  
10  
11 205 transcripts and identified emergent themes. These two authors then checked for consistency  
12  
13 206 between their analyses and discussed any differences until consensus was reached. An inductive  
14  
15 207 approach was employed, where emerging data were used to develop, refine and verify themes  
16  
17 208 and findings. Descriptive statistics were calculated for the socio-demographic data using  
18  
19 209 Microsoft Excel 2008<sup>®</sup>.

20 **RESULTS**

21  
22  
23  
24  
25  
26  
27 211 Six FGDs with a total of 44 providers (41 female, 3 male), all of whom self-identified as  
28  
29 212 Hispanic/Latino, were conducted before thematic saturation was reached, with no new themes or  
30  
31 213 subthemes emerging during the sixth FGD. As displayed in Table 1, about one-third of  
32  
33 214 participants had graduated from high school (n = 10; 22.7%) or earned their general education  
34  
35 215 diploma (GED) (n = 4; 9.2%), and close to 40% (n = 17; 38.5%) had attended some college.  
36  
37 216 Approximately 95.5% (n= 42) were born outside of the U.S., and had lived in the U.S. for an  
38  
39 217 average of 22 years. All reported that Spanish was the main language spoken at home. Themes  
40  
41 218 that emerged during the qualitative analyses are discussed in the following section, with quotes  
42  
43 219 used to illustrate the themes.

44 ***Theme 1: Providers Believe Healthy Eating and Physical Activity Are Important***

45  
46  
47  
48  
49 220 Across all FGDs, providers appeared aware of the benefits of eating healthy (e.g., eating  
50  
51 221 fruits and vegetables, avoiding “junk” food, drinking water, and limiting sugar-sweetened  
52  
53  
54  
55  
56  
57  
58  
59  
60



## Latino Family Child Care Providers as Role Models

1  
2  
3 223 beverages, etc.) and being physically active, and believed that these practices are an integral  
4  
5 224 influence on one's overall health. As one provider explained:

6  
7  
8 225 "Eating healthy and being physically active is an important part of being healthy. Past  
9  
10 226 generations have known this for ages." (Female Provider (FP) #10, Dominican Republic)

11 227 Overwhelmingly, providers believed in the importance of healthy eating and being  
12  
13 228 physically active for children's overall health and socio-emotional wellbeing. As one provider  
14  
15 229 said:

16  
17  
18 230 "Eating healthy and being physically active are very important for children's health and  
19  
20 231 well-being.... Children are growing, learning and developing these habits while they are  
21  
22 232 young. These [behaviors] will help them later in life." (FP#23, Mexico)

23  
24  
25 233 Providers also recognized that children are exposed to and spend many hours on  
26  
27 234 sedentary activities such as playing video games, watching TV, and using of electronics, and felt  
28  
29 235 it was important to minimize the use of electronics.

30  
31  
32 236 "I don't really allow any use of electronics. It's really hard, but nowadays even little kids  
33  
34 237 and babies have so much access to electronics. My policy is that kids cannot bring any  
35  
36 238 electronics to daycare." (FP#11, Colombia)

37  
38  
39 239 Furthermore, most providers felt that screen-time should be regulated, and several spoke  
40  
41 240 of not allowing children to have more than one hour of screen-time per day. Watching TV was  
42  
43 241 the most common type of screen-time providers reported allowing children to have, and that they  
44  
45 242 watching TV was most often allowed during transitions such as drop-off, pickup, and meal  
46  
47 243 preparation. Some providers reported that they regulated screen-time in hopes of increasing  
48  
49 244 children's physical activity.  
50  
51  
52  
53  
54  
55  
56  
57  
58  
59  
60

## Latino Family Child Care Providers as Role Models

1  
2  
3 245 “I feel that we need to regulate how much TV and electronics we allow to make sure that  
4  
5 246 the kids are active. In our daycare, we [couple-run FCCH] only allow it during drop-off  
6  
7  
8 247 and pick-up and sometimes when we both need to prepare lunch” (Male Provider  
9  
10 248 (MP)#3, Colombia)

249 ***Theme 2: Providers Recognize Their Eating and Physical Activity Habits Could Improve***

15 250 Nearly all providers spoke of needing to improve their own eating and physical activity  
16  
17 251 habits to promote weight loss and improve their overall health. For example, one provider stated:  
18  
19  
20 252 “I know I need to improve my eating habits, start eating more healthy foods, and keep  
21  
22 253 away from the junk food. I know that if I change the way I eat, I will lose some weight,  
23  
24 254 and I really need to do that for my health.” (FP#18, Dominican Republic)

26  
27 255 Several providers discussed struggling with being overweight. Some described how their  
28  
29 256 being overweight affected their energy levels and overall health, while others expressed concerns  
30  
31 257 for their current health status. One provider stated:

34 258 “Since I had my kids and gained weight, I have tried to lose, but it’s not easy. You lose  
35  
36 259 the weight and then gain it again.” (FP#6, Colombia)

38  
39 260 Another provider mentioned:

41 261 “I would like to lose some weight and be more active. I know I need to do it. I am aware  
42  
43 262 that my weight is a problem and that it affects my health.” (FP#17, Puerto Rico)

45  
46 263 Moreover, most providers reported being told by their healthcare providers that they  
47  
48 264 needed to lose weight to improve their health and various health issues such as arthritis,  
49  
50 265 hypertension, and type 2 diabetes. As one provider stated:

53 266 “The last time I saw my doctor, he told me I needed to lose weight if I did not want to  
54  
55 267 become diabetic ... so, I am trying for my health.” (FP#4, Guatemala)

Latino Family Child Care Providers as Role Models

1  
2  
3 268 ***Theme 3: Personal Barriers to Healthy Eating and Physical Activity Behaviors***  
4

5 269 Providers discussed daily life obligations, including work, competing demands, and  
6  
7  
8 270 limited resources as being barriers to being healthy. One provider said:

9  
10 271 “You know, I always say, we are in the business of taking care of others, we are not good  
11  
12 272 about taking care of ourselves even though we know we need to ... There is very little  
13  
14 273 time and when there is any time, you are just tired.” (FP#38, Colombia)

15  
16  
17 274 Another provider added:

18  
19  
20 275 “I have a busy schedule with work, and when I am not working, I am trying to take care  
21  
22 276 of the house and my family. It’s a busy life. There’s barely any time for taking care of  
23  
24 277 myself.... Just taking time off to go to a doctor’s appointment is difficult.” (FP#8,  
25  
26  
27 278 Dominican Republic)

28  
29 279 Another provider explained:

30  
31  
32 280 “You get caught up with work and daily life, and at the end, there is little time to take  
33  
34 281 care of oneself.” (FP#33, Puerto Rico)

35  
36 282 Some providers spoke about attempting to change their eating and physical activity habits  
37  
38  
39 283 without success, and a few voiced a lack of confidence in their ability to overcome the  
40  
41 284 obligations and demands of day-to-day life to focus on and succeed in this change. One provider  
42  
43 285 explained:

44  
45  
46 286 “You know, I have tried many times. It starts well. I plan my food in advance, I start  
47  
48 287 going for walks, but then something happens, and it gets me off track and when I realize,  
49  
50 288 I am back to the same old habits.... It’s hard when you have to take care of so many  
51  
52  
53 289 things, with long and demanding working hours, and you don’t have the time to focus on  
54  
55 290 yourself.” (FP#2, Honduras)  
56  
57  
58  
59  
60

## Latino Family Child Care Providers as Role Models

291 Furthermore, providers reported that although they were aware of the importance of  
292 healthy eating and physical activity, this knowledge did not always translate into them being  
293 physically active and eating healthy. As one provider said:

294 “It’s what they say, it’s easier said than done...We know it’s important to eat healthy and  
295 be physically active and not sit around and just watch TV, etcetera, but putting these to  
296 practice is not as easy as just saying it.” (FP#12, Dominican Republic)

297 ***Theme 4: Providers Are Confident in Their Abilities to Help Children Develop Healthy Eating***  
298 ***and Physical Activity Habits***

299 Across all FGDs, providers spoke of their influential role in educating children about  
300 healthy eating and physical activity habits. As one provider said:

301 “We are teaching the children not only how to get along with one another, but we teach  
302 them that it’s important to eat healthy, to be active and healthy! I have parents thank me  
303 for teaching their children how to be healthy. The parents don’t have the time. They are  
304 not with the kids during the day. They get home and they are tired; after working long  
305 hours, they don’t have time.” (FP#41, Colombia)

306 Providers mentioned using strategies such as telling the children about the importance of  
307 being healthy—eating healthy and being active. One provider stated:

308 “I am always telling the children that it’s really important to eat healthy foods and be  
309 active if they want to grow up and be healthy.” (FP#27, Peru)

310 Most providers had high self-efficacy about their abilities to help children develop  
311 healthy eating and physical activity habits. Providers were confident in their ability to serve as  
312 educators and that they had the knowledge needed to teach children and their families about  
313 healthy diets and physical activity. One provider said:

## Latino Family Child Care Providers as Role Models

1  
2  
3 314 “I feel very confident in my ability to help the children be healthy—eat well, be active...  
4  
5 315 We are always going to trainings, reading the materials; we have to keep well informed.  
6  
7  
8 316 (MP#1, Dominican Republic)  
9

10 ***Theme 5: Providers View Themselves as Role Models***

11  
12 318 Providers spoke of being role models for children in their care, despite the majority  
13  
14 319 acknowledging that their own eating and physical activity health behaviors need to improve. As  
15  
16  
17 320 one provider stated:

18  
19  
20 321 “We know that it’s important that we set a good example for the children, and I try my  
21  
22 322 best. We want to do the right thing for the children, even if you don’t do it for yourself.”  
23  
24 323 (FP#36, Ecuador)  
25

26  
27 324 Another provider added:

28  
29 325 “It’s important for the children to see us [adults] choosing healthy foods. Children want  
30  
31 326 to copy what others do. So, if they see you eating fruits, they will want to eat fruits, but if  
32  
33 327 they see you eating chips, that’s what they will want to eat.” (FP#13, Colombia)  
34

35  
36 328 Finally, some providers reported that improving their eating and physical activity  
37  
38 329 behaviors would make them better role models for children. As one provider stated:

39  
40 330 “Kids observe what we [adults] do, and they learn by seeing and copying what we  
41  
42 331 [adults] do. So, I do all I can to help and teach the children to eat healthy and be  
43  
44 332 physically active, but I know that if I am not doing it, it does not set a good example for  
45  
46 333 them. I know that if they see me eating healthy and being active, they will want to eat  
47  
48 334 healthy and be active ... they copy our [adults] habits.” (FP#5, Guatemala)  
49  
50  
51  
52  
53  
54  
55  
56  
57  
58  
59  
60

## Latino Family Child Care Providers as Role Models

335 **DISCUSSION**

336 Building on our prior research examining providers' beliefs about healthy eating,  
337 physical activity and sedentary behaviors,<sup>11</sup> this study explored how Latino FCCH providers  
338 view their ability to serve as role models for healthy eating and physical activity behaviors for  
339 young children in their care. Mounting evidence suggests that child care providers influence the  
340 development of children's health behaviors through modeling of behaviors,<sup>4,10,11,13,31,32</sup> yet,  
341 limited research has explored how FCCH providers view their ability to model healthful  
342 behaviors for young children in their care.<sup>10, 11,13,31,32</sup> Parents increasing reliance on child care  
343 settings for their children, makes child care providers influential in promoting the development  
344 and maintenance of healthy behaviors for children in their care. Therefore, it is critical to  
345 understand how providers' view their role and ability in promoting healthy behaviors.<sup>4,5,12</sup> To  
346 our knowledge, no studies have focused on Latino FCCH providers as role models. The present  
347 study addresses this research gap. This information is needed given that FCCH providers care for  
348 a large number of racial/ethnic minority children, including Latinos—a group at high risk of  
349 childhood obesity.<sup>3-8</sup>

350 Latino FCCH providers participating in this qualitative study viewed themselves as being  
351 knowledgeable about nutrition and physical activity, and being influential in helping children in  
352 their care develop and maintain healthy eating and physical activity habits. Moreover, study  
353 findings suggest that providers perceive that their own behaviors influence those of the children  
354 in their care. Nonetheless, the majority of providers reported that their own eating and physical  
355 activity behaviors needed to improve. These findings are consistent with a recent quantitative  
356 study conducted with a convenience sample of FCCH providers (n=166) in North Carolina, US

## Latino Family Child Care Providers as Role Models

1  
2  
3 357 that found that almost all providers (89.8%) were overweight or obese and approximately half of  
4  
5 358 the sample did not meet health guidelines for physical activity and fruit and vegetable intake.<sup>31</sup>  
6  
7

8 359 Findings of the present study suggest that Latino FCCH providers' ability to model  
9  
10 360 healthy eating and physical activity behaviors for children in their care may be limited by their  
11  
12 361 low self-efficacy to participate in these behaviors themselves. This finding suggests that  
13  
14 362 interventions should focus on helping FCCH providers change their eating and physical activity  
15  
16 363 behaviors, including increasing their self-efficacy for performing these behaviors. SCT posits  
17  
18 364 that behaviors are influenced by many factors with one of them being observational  
19  
20 365 learning.<sup>15,16,17</sup> Therefore, improving Latino FCCH providers' health behaviors would be  
21  
22 366 beneficial for the providers' health status, and would also be an important target in the promotion  
23  
24 367 of children's healthy eating and physical activity behaviors.<sup>33-35</sup>  
25  
26  
27  
28

29 368 Most providers participating in this study reported lack of time and resources as being  
30  
31 369 barriers to improving their eating and physical activity behaviors. FCCH providers need time,  
32  
33 370 resources, and support to improve their own eating and physical activity habits. Interventions  
34  
35 371 designed to improve the eating and physical activity environments of FCCHs should target  
36  
37 372 providers' personal health behaviors, incorporate training resources, and offer other supports to  
38  
39 373 help FCCH providers change their behaviors and maintain a healthy weight. Furthermore,  
40  
41 374 interventions should consider the busy lives of FCCH providers and the limited resources of  
42  
43 375 FCCHs.  
44  
45  
46  
47

48 376 In conclusion, findings from the present study add to the scant literature examining child  
49  
50 377 care providers' personal health behaviors and the potential influence of providers' modeling of  
51  
52 378 health behaviors for children in their care.<sup>31,36,37</sup> Findings highlight the need for increased  
53  
54 379 attention to FCCH providers' health behaviors as a means of increasing providers' health status  
55  
56  
57  
58  
59  
60

## Latino Family Child Care Providers as Role Models

1  
2  
3 380 as well as health behaviors of young children in these settings. Future research could build on the  
4  
5 381 findings of this study by quantifying Latino providers' self-efficacy to perform healthy eating and  
6  
7  
8 382 physical activity and by determining how FCCH providers' health behaviors influence the  
9  
10 383 behaviors and health outcomes of children in their care.

11  
12  
13 384 Study results should be considered in light of some limitations. Findings are based on a  
14  
15 385 non-random, purposeful, and relatively small sample of low-income, Latino FCCH providers in  
16  
17 386 four selected communities in MA, U.S., which limits the generalizability of the findings. There is  
18  
19  
20 387 a possibility of selection bias as it may be that providers with a heightened interest in promoting  
21  
22 388 health behaviors chose to take part in the study. Furthermore, providers aware of the importance  
23  
24 389 of health behaviors may have been inclined to give socially desirable responses. The lack of data  
25  
26  
27 390 on providers who did not join the study does not allow for assessment of the extent to which the  
28  
29 391 providers in our sample represented the broader group of Latino FCCH providers. Thus, further  
30  
31 392 research is needed to establish greater generalizability of the findings of the present study and to  
32  
33  
34 393 explore if they are applicable to other ethnic groups of FCCH providers in other parts of the  
35  
36 394 country. Another limitation of this study is the FCCH's limited discussion of sedentary behavior.  
37  
38  
39 395 This may have been due to the content of the FGD guide. Finally, despite the use of a rigorous  
40  
41 396 process of backward-forward translation to ensure the integrity and equivalence of the data, it is  
42  
43 397 possible that some loss of meaning might have occurred in the process. Future research can  
44  
45  
46 398 address these limitations by exploring influences on Latino providers' beliefs, attitudes, and  
47  
48 399 practices from other communities across the U.S., selecting a larger sample size, and using  
49  
50 400 multiple methods of data collection including direct observations.  
51  
52  
53  
54  
55  
56  
57  
58  
59  
60



## Latino Family Child Care Providers as Role Models

401 **CONCLUSION**

402           Increasing evidence indicates the important role FCCH providers play in promoting and  
403 modeling healthy eating and physical activity for children in their care. Therefore, interventions  
404 targeting FCCH settings should consider health promotion activities to increase FCCH  
405 providers' self-efficacy for physical activity and healthy eating, and supports to help providers  
406 improve their eating and physical activity behaviors. These efforts would likely improve FCCH  
407 providers' eating and physical activity behaviors and promote healthy eating and physical  
408 activity behaviors and positive health outcomes of children attending FCCHs.

409 **Abbreviations**

410 FCCHs: Family Child Care Homes; ECE: Early Care and Education; SCT: Social Cognitive  
411 Theory; MA: Massachusetts; U.S.: United States; GED: General Educational Diploma; FGD:  
412 Focus Group Discussion; FP: Female Provider; MP: Male Provider.

413 **REFERENCES**

- 414
- 415 1. The Hispanic population: Available online:  
416 <https://www.census.gov/prod/cen2010/briefs/c2010br-04.pdf> (accessed on July 29 2017).
  - 417 2. Flegal, K.M.; Kruszon-Moran, D.; Carroll, M.D.; Fryar, C.D.; Ogden, C.L. Trends in obesity  
418 among adults in the United States, 2005 to 2014. *JAMA* 2016, *315*, 2284–2291.  
419 doi:10.1001/jama.2016.6458.
  - 420 3. Ogden, C. L., Carroll, M. D., & Flegal, K. M. Prevalence of obesity in the United States.  
421 *JAMA* 2014; *312*(2), 189-190. doi:10.1001/jama.2014.6228
  - 422 4. Larson, N., Ward, D. S., Neelon, S. B., & Story, M. What role can child-care settings play in  
423 obesity prevention? A review of the evidence and call for research efforts. *Journal of the*  
424 *American Dietetic Association* 2011; *111*: 1343-1362.
  - 425 5. Sisson, S.B., Krampe, M. Anundson, K., & Castle, S. (2016). Obesity prevention and  
426 obesogenic behavior interventions in child care: A systematic review. *Preventive Medicine*  
427 2016; *87*:57-69. doi:10.1016/j.ypmed.2016.02.016
  - 428 6. Child Care Aware of America. *Child care in America: 2016 state fact sheets*. 2016; Retrieved  
429 from [http://usa.childcareaware.org/advocacy-public-policy/resources/reports-and-](http://usa.childcareaware.org/advocacy-public-policy/resources/reports-and-research/statefactsheets/)  
430 [research/statefactsheets/](http://usa.childcareaware.org/advocacy-public-policy/resources/reports-and-research/statefactsheets/)
  - 431 7. Centers for Disease Control and Prevention (CDC). Early child care and education (ECE).  
432 Atlanta, GA: Author.

## Latino Family Child Care Providers as Role Models

- 1  
2  
3 433 8. Laughlin, L. *Who's minding the kids? Child care arrangements: Spring 2011* (Report No.  
4 434 P70-135, U.S. Department of Commerce, U.S. Census Bureau). 2013; Retrieved from  
5 435 <http://www.census.gov/content/dam/Census/library/publications/2013/demo/p70-135.pdf>
- 6 436 9. Daugherty, L. *Child care choices of Hispanic families: Why aren't families using child care?*  
7 437 (Doctoral dissertation). 2010; Retrieved from [http://www.rand.org/pubs/rgs\\_](http://www.rand.org/pubs/rgs_dissertations/RGSD258.html)  
8 438 [dissertations/RGSD258.html](http://www.rand.org/pubs/rgs_dissertations/RGSD258.html)
- 9 439 10. Lindsay, A. C., Greaney, M. L., Wallington, S. F., Sands, F. D., Wright, J. A., & Salkeld, J.  
10 440 Latino parents' perceptions of the eating and physical activity experiences of their pre-  
11 441 school children at home and at family child-care homes. *Public Health Nutrition* 2017;  
12 442 20(2): 346-356. doi:10.1017/S136898001600207X
- 13 443 11. Lindsay, A. C., Salkeld, J. A., Greaney, M. L., & Sands, F. D. Latino family child care  
14 444 providers' beliefs, attitudes and practices related to promotion of healthy behaviors  
15 445 among preschool children: A qualitative study. *Journal of Obesity* 2015;  
16 446 doi:10.1155/2015/409742.
- 17 447 12. Story, M., Kaphingst, K. M., & French, S. The role of child care settings in obesity  
18 448 prevention. *Future Child* 2006; 16(1): 143-168.
- 19 449 13. Erinosh, T. O., Hales, D. P., McWilliams, C. P., Emunah, J., & Ward, D. S. Nutrition  
20 450 policies at child-care centers and impact on role modeling of healthy eating behaviors of  
21 451 caregivers. *Journal of the Academy of Nutrition and Dietetics* 2012; 112(1): 119-124.  
22 452 doi:10.1016/j.jada.2011.08.04
- 23 453 14. Ward, S., Bélanger, M., Donovan, D., & Carrier, N. Systematic review of the relationship  
24 454 between childcare educators' practices and preschoolers' physical  
25 455 activity and eating behaviours. *Obesity Review* 2015; 16(12): 1055-1070.  
26 456 doi:10.1111/obr.12315
- 27 457 15. Bandura, A. Social cognitive theory: An agentic perspective. *Annual Review of Psychology*  
28 458 2001; 52: 1-26. doi:10.1146/annurev.psych.52.1.1
- 29 459 16. Bandura, A. (2004). Health promotion by social cognitive means. *Health Education & Behavior*  
30 460 2004; 31:143-164. doi:10.1177/1090198104263660
- 31 461 17. Bandura, A. Toward a psychology of human agency. *Perspectives on Psychological Science*  
32 462 2006; 1: 164-180. doi:10.1111/j.1745-6916.2006.00011.x
- 33 463 18. Mann, C. M., Ward, D. S., Vaughn, A., Benjamin Neelon, S. E., Long Vidal, L. J., Omar,  
34 464 S.,... Østbye, T. Application of the intervention mapping protocol to develop Keys, a  
35 465 family child care home intervention to prevent early childhood obesity. *BMC Public*  
36 466 *Health* 2015; 10(15): 1227. doi:10.1186/s12889-015-2573-9
- 37 467 19. Fees, B., Trost, S., Bopp, M., & Dzewaltowski, D. A. Physical activity programming in  
38 468 family child care homes: Providers' perceptions of practices and barriers. *Journal of*  
39 469 *Nutrition Education and Behavior* 2009; 41(4): 268-273. doi:10.1016/j.jneb.2008.01.013
- 40 470 20. Lawrence, S., Schwarte, L., Samuels, S., & McCarthy, W. J. Health care providers'  
41 471 perceived role in changing environments to promote healthy eating and physical activity:  
42 472 Baseline findings from health care providers participating in the healthy eating, active  
43 473 communities program. *Pediatrics* 2009; 123(Suppl 5): S293-300. doi:10.1542/peds.2008-  
44 474 2780H
- 45 475 21. Østbye, T., Mann, C. M., Vaughn, A. E., Namenek Brouwer, R. J., Benjamin Neelon, S.  
46 476 E., Hales, D.,... Ward, D. S. The keys to healthy family child care homes intervention:  
47 477 Study design and rationale. *Contemporary Clinical Trials* 2015; 40: 81-89.  
48 478 doi:10.1016/j.cct.2014.11.003

## Latino Family Child Care Providers as Role Models

- 1  
2  
3 479 22. Tovar, A., Risica, P., Mena, N., Lawson, E., Ankoma, A., & Gans, K. M. An assessment of  
4 480 nutrition practices and attitudes in family child-care homes: Implications for policy  
5 481 implementation. *Preventing Chronic Disease* 2015;4(12): E88.  
6 482 doi:10.5888/pcd12.140587
- 7  
8 483 23. Trost, S. G., Messner, L., Fitzgerald, K., & Roths, B. A nutrition and physical  
9 484 activity intervention for family child care homes. *American Journal of Preventive*  
10 485 *Medicine* 2011; 41(4): 392-398. doi:10.1016/j.amepre.2011.06.030
- 11 486 24. de Silva-Sanigorski, A., Elea, D., Bell, C., Kremer, P., Carpenter, L., Nichols,  
12 487 M.,...Swinburn, B. Obesity prevention in the family day care setting: Impact of the  
13 488 Romp & Chomp intervention on opportunities for children's physical activity and  
14 489 healthy eating. *Child Care Health and Development* 2011; 37(3): 385-393.  
15 490 doi:10.1111/j.1365-2214.2010.01205.x
- 16 491 25. Tucker, P., Vanderloo, L. M., Burke, S. M., Irwin, J. D., & Johnson, A. M. Prevalence and  
17 492 influences of preschoolers' sedentary behaviors in early learning centers: A cross-  
18 493 sectional study. *BMC Pediatrics* 2015; 18(15): 128. doi:10.1186/s12887-015-0441-5
- 19 494 26. Culley, L., Hudson, N., & Rapport, F. Using focus groups with minority ethnic communities:  
20 495 Researching infertility in British South Asian communities. *Qualitative Health Research*  
21 496 2007; 17(1): 102-112.
- 22 497 27. Kidd, P. S., & Parshall, M. B. Getting the focus and the group: Enhancing analytical rigor in  
23 498 focus group research. *Qualitative Health Research* 2000; 10(3): 293-308.
- 24 499 28. Vaismoradi, M., H. Turunen, and T. Bondas. Content analysis and thematic analysis:  
25 500 Implications for conducting a qualitative descriptive study. *Nurs Health Sci.* 2013;  
26 501 15(3):398-405. doi:10.1111/nhs.12048.
- 27 502 29. Silverman, D. *Interpreting Qualitative Data: Methods for Analysing Talk, Text and*  
28 503 *Interaction* (3rd ed.). London: Sage. 2006.
- 29 504 30. Ritchie J, Spencer L, O'Connor W. Carrying out qualitative analysis. In Ritchie J, Lewis J  
30 505 (eds) *Qualitative research practice*. 2004; 219-262. London: Sage Publications.
- 31 506 31. Tovar, A., Vaughn, A. E., Grummon, A., Burney, R., Erinosh, T., Østbye, T., & Ward, D. S.  
32 507 (2016). Family child care home providers as role models for children: Cause for concern?  
33 508 *Preventive Medicine Reports*. 2016; 14(5): 308-313. doi:10.1016/j.pmedr.2016.11.01.
- 34 509 32. Tovar A, Mena NZ, Risica P, Gorham G, Gans KM. Nutrition and Physical Activity  
35 510 Environments of Home-Based Child Care: What Hispanic Providers Have to Say.  
36 511 *Child Obes.* 2015; 11(5):521-9. doi: 10.1089/chi.2015.0040.
- 37 512 33. Brown, R., & Ogden, J. Children's eating attitudes and behavior: A study of the modeling  
38 513 and control theories of parental influence. *Health Education Research* 2004; 19(3), 261-  
39 514 271.
- 40 515 34. HENDY, H. M., & RAUDENBUSH, B. Effectiveness of teacher modeling to encourage food  
41 516 acceptance in preschool children. *Appetite* 2000; 34(1): 61-76.  
42 517 doi:10.1006/appe.1999.0286
- 43 518 35. Nicklas, T. A., Baranowski, T., Baranowski, J. C., Cullen, K., Rittenberry, L., & Olvera, N.  
44 519 (2001). Family and child-care provider influences on preschool children's fruit, juice, and  
45 520 vegetable consumption. *Nutrition Reviews* 2001; 59(7), 224-235. doi:10.1111/j.1753-  
46 521 4887.2001.tb07014.x
- 47 522 36. Baldwin D., Gaines S., Wold J.L., Williams A., Leary J. The health of female child care  
48 523 providers: implications for quality of care. *J. Community Health Nurs.* 2007;24:1-17.
- 49  
50  
51  
52  
53  
54  
55  
56  
57  
58  
59  
60

Latino Family Child Care Providers as Role Models

1  
2  
3  
4  
5  
6  
7  
8  
9  
10  
11  
12  
13  
14  
15  
16  
17  
18  
19  
20  
21  
22  
23  
24  
25  
26  
27  
28  
29  
30  
31  
32  
33  
34  
35  
36  
37  
38  
39  
40  
41  
42  
43  
44  
45  
46  
47  
48  
49  
50  
51  
52  
53  
54  
55  
56  
57  
58  
59  
60

524 37. Bromer J. Helpers, mothers, and preachers: the multiple roles and discourses of family child  
525 care providers in an African-American community. *Early Child Res. Q.* 2001;16:313–  
526 327.

For peer review only

## Latino Family Child Care Providers as Role Models

**Table 1. Socio-demographic and acculturation characteristics of focus group participants (n = 44).**

| Age                                        | Mean $\pm$ SD | N (%)     |
|--------------------------------------------|---------------|-----------|
|                                            | 41 $\pm$ 9.3  |           |
| <b>Race</b>                                |               |           |
| Hispanic or Latino                         |               | 44 (100)  |
| <b>Sex</b>                                 |               |           |
| Female                                     |               | 41 (93.2) |
| Male                                       |               | 3 (6.8)   |
| <b>Foreign-born</b>                        |               |           |
| Yes                                        |               | 42 (95.5) |
| No                                         |               | 2 (4.5)   |
| <b>Country of origin</b>                   |               |           |
| Colombia                                   |               | 12 (27.3) |
| Dominican Republic                         |               | 9 (20.5)  |
| Guatemala                                  |               | 5 (11.4)  |
| Puerto Rico                                |               | 4 (9.2)   |
| Peru                                       |               | 3 (6.8)   |
| United States                              |               | 2 (4.5)   |
| Mexico                                     |               | 2 (4.5)   |
| El Salvador                                |               | 2 (4.5)   |
| Honduras                                   |               | 2 (4.5)   |
| Ecuador                                    |               | 2 (4.5)   |
| Cuba                                       |               | 1 (2.3)   |
| <b>Years in the United States</b>          |               |           |
|                                            | Mean $\pm$ SD |           |
|                                            | 22 $\pm$ 3.4  |           |
| <b>Predominant language spoken at home</b> |               |           |
| Spanish                                    |               | 44 (100)  |
| <b>Marin scale acculturation score</b>     |               |           |
|                                            | Mean $\pm$ SD |           |
|                                            | 2.2 $\pm$ 0.9 |           |
| <b>Education</b>                           |               |           |
| GED*                                       |               | 4 (9.2)   |
| High school graduate                       |               | 10 (22.7) |
| Associate                                  |               | 17 (38.5) |
| Bachelor                                   |               | 12 (27.3) |
| Missing                                    |               | 1 (2.3)   |
| <b>Annual household income</b>             |               |           |
| Under \$25,000                             |               | 10 (22.7) |
| \$25,000–\$50,000                          |               | 26 (59.1) |
| More than \$50,000                         |               | 8 (18.2)  |
| <b>Marital status</b>                      |               |           |
| Single                                     |               | 2 (4.5)   |
| Married                                    |               | 28 (63.3) |
| Separated                                  |               | 4 (9.2)   |
| Divorced                                   |               | 8 (18.2)  |
| Widowed                                    |               | 2 (4.5)   |

\* GED: General Educational Diploma

## COREQ (CONsolidated criteria for REporting Qualitative research) Checklist

A checklist of items that should be included in reports of qualitative research. You must report the page number in your manuscript where you consider each of the items listed in this checklist. If you have not included this information, either revise your manuscript accordingly before submitting or note N/A.

| Topic                                          | Item No. | Guide Questions/Description                                                                                                                              | Reported on Page No. |
|------------------------------------------------|----------|----------------------------------------------------------------------------------------------------------------------------------------------------------|----------------------|
| <b>Domain 1: Research team and reflexivity</b> |          |                                                                                                                                                          |                      |
| <i>Personal characteristics</i>                |          |                                                                                                                                                          |                      |
| Interviewer/facilitator                        | 1        | Which author/s conducted the interview or focus group?                                                                                                   | 2,9                  |
| Credentials                                    | 2        | What were the researcher's credentials? E.g. PhD, MD                                                                                                     | 1                    |
| Occupation                                     | 3        | What was their occupation at the time of the study?                                                                                                      | 1                    |
| Gender                                         | 4        | Was the researcher male or female?                                                                                                                       | 2,9                  |
| Experience and training                        | 5        | What experience or training did the researcher have?                                                                                                     | 9                    |
| <i>Relationship with participants</i>          |          |                                                                                                                                                          |                      |
| Relationship established                       | 6        | Was a relationship established prior to study commencement?                                                                                              | 8                    |
| Participant knowledge of the interviewer       | 7        | What did the participants know about the researcher? e.g. personal goals, reasons for doing the research                                                 | 8                    |
| Interviewer characteristics                    | 8        | What characteristics were reported about the interviewer/facilitator? e.g. Bias, assumptions, reasons and interests in the research topic                | 9                    |
| <b>Domain 2: Study design</b>                  |          |                                                                                                                                                          |                      |
| <i>Theoretical framework</i>                   |          |                                                                                                                                                          |                      |
| Methodological orientation and Theory          | 9        | What methodological orientation was stated to underpin the study? e.g. grounded theory, discourse analysis, ethnography, phenomenology, content analysis | 8                    |
| <i>Participant selection</i>                   |          |                                                                                                                                                          |                      |
| Sampling                                       | 10       | How were participants selected? e.g. purposive, convenience, consecutive, snowball                                                                       | 8                    |
| Method of approach                             | 11       | How were participants approached? e.g. face-to-face, telephone, mail, email                                                                              | 8                    |
| Sample size                                    | 12       | How many participants were in the study?                                                                                                                 | 10                   |
| Non-participation                              | 13       | How many people refused to participate or dropped out? Reasons?                                                                                          | 8,10                 |
| <i>Setting</i>                                 |          |                                                                                                                                                          |                      |
| Setting of data collection                     | 14       | Where was the data collected? e.g. home, clinic, workplace                                                                                               | 8                    |
| Presence of non-participants                   | 15       | Was anyone else present besides the participants and researchers?                                                                                        | 9                    |
| Description of sample                          | 16       | What are the important characteristics of the sample? e.g. demographic data, date                                                                        | Table 1              |
| <i>Data collection</i>                         |          |                                                                                                                                                          |                      |
| Interview guide                                | 17       | Were questions, prompts, guides provided by the authors? Was it pilot tested?                                                                            | 9                    |
| Repeat interviews                              | 18       | Were repeat interviews carried out? If yes, how many?                                                                                                    | 10                   |
| Audio/visual recording                         | 19       | Did the research use audio or visual recording to collect the data?                                                                                      | 9                    |
| Field notes                                    | 20       | Were field notes made during and/or after the interview or focus group?                                                                                  | 9                    |
| Duration                                       | 21       | What was the duration of the interviews or focus group?                                                                                                  | 9                    |
| Data saturation                                | 22       | Was data saturation discussed?                                                                                                                           | 10                   |
| Transcripts returned                           | 23       | Were transcripts returned to participants for comment and/or                                                                                             | N/A                  |

| Topic                                  | Item No. | Guide Questions/Description                                                                                                        | Reported on Page No. |
|----------------------------------------|----------|------------------------------------------------------------------------------------------------------------------------------------|----------------------|
|                                        |          | correction?                                                                                                                        |                      |
| <b>Domain 3: analysis and findings</b> |          |                                                                                                                                    |                      |
| <i>Data analysis</i>                   |          |                                                                                                                                    |                      |
| Number of data coders                  | 24       | How many data coders coded the data?                                                                                               | 10                   |
| Description of the coding tree         | 25       | Did authors provide a description of the coding tree?                                                                              | N/A, 10              |
| Derivation of themes                   | 26       | Were themes identified in advance or derived from the data?                                                                        | 10                   |
| Software                               | 27       | What software, if applicable, was used to manage the data?                                                                         | N/A                  |
| Participant checking                   | 28       | Did participants provide feedback on the findings?                                                                                 | N/A                  |
| <i>Reporting</i>                       |          |                                                                                                                                    |                      |
| Quotations presented                   | 29       | Were participant quotations presented to illustrate the themes/findings?<br>Was each quotation identified? e.g. participant number | 11-16                |
| Data and findings consistent           | 30       | Was there consistency between the data presented and the findings?                                                                 | 11-18                |
| Clarity of major themes                | 31       | Were major themes clearly presented in the findings?                                                                               | 11-16                |
| Clarity of minor themes                | 32       | Is there a description of diverse cases or discussion of minor themes?                                                             | 11-16                |

Developed from: Tong A, Sainsbury P, Craig J. Consolidated criteria for reporting qualitative research (COREQ): a 32-item checklist for interviews and focus groups. *International Journal for Quality in Health Care*. 2007. Volume 19, Number 6: pp. 349 – 357

Once you have completed this checklist, please save a copy and upload it as part of your submission. DO NOT include this checklist as part of the main manuscript document. It must be uploaded as a separate file.
